# Supplementary material for: Version 8 IMK–IAA MIPAS temperatures from 12–15 µm spectra: Middle and Upper Atmosphere modes
Source: Copernicus journal article supplement (doi:10.5194/amt-16-5357-2023), 2023-11-10
Supplement: Supplementary file 1 [file amt-16-5357-2023-supplement.pdf]

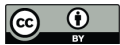

*Supplement of*

## **Version 8 IMK–IAA MIPAS temperatures from 12–15 $\mu\text{m}$ spectra: Middle and Upper Atmosphere modes**

**Maya Garcí et al.**

*Correspondence to:* Maya García-Comas ([maya@iaa.es](mailto:maya@iaa.es))

The copyright of individual parts of the supplement might differ from the article licence.

This supplement contains the temperature error budget collection for MIPAS MA/UA RR data (2005-2012) for daytime ( $SZA < 90^\circ$ ) and nighttime ( $SZA > 95^\circ$ ), estimated using the representative atmospheres listed in Table S1.

**Table S1.** Labels and definitions of the representative atmospheric conditions used to estimate MIPAS temperature errors.

| Atmosphere label            | Months used | Latitude range |
|-----------------------------|-------------|----------------|
| Northern polar winter       | Jan, Feb    | 65°N–90°N      |
| Northern polar spring       | Apr         | 65°N–90°N      |
| Northern polar summer       | Jul, Aug    | 65°N–90°N      |
| Northern polar autumn       | Oct         | 65°N–90°N      |
| Northern midlatitude winter | Jan, Feb    | 40°N–60°N      |
| Northern midlatitude spring | Apr         | 40°N–60°N      |
| Northern midlatitude summer | Jul, Aug    | 40°N–60°N      |
| Northern midlatitude autumn | Oct         | 40°N–60°N      |
| Tropics                     | Apr         | 20°S–20°N      |
| Southern midlatitude winter | Jul, Aug    | 40°S–60°S      |
| Southern midlatitude spring | Oct         | 40°S–60°S      |
| Southern midlatitude summer | Jan, Feb    | 40°S–60°S      |
| Southern midlatitude autumn | Apr         | 40°S–60°S      |
| Southern polar winter       | Jul, Aug    | 65°S–90°S      |
| Southern polar spring       | Oct         | 65°S–90°S      |
| Southern polar summer       | Jan, Feb    | 65°S–90°S      |
| Southern polar autumn       | Apr         | 65°S–90°S      |

**Table S2.** Temperature error budget for Northern polar winter day. "Mean" column refers to the mean temperature. "NLTE" and "Spectro" correspond to errors due to non-LTE and spectroscopy uncertainties, respectively. "Random" and "Syst" refer to total random and systematic temperature errors, respectively. All uncertainties are  $1\sigma$ .

| Altitude (km) | Mean (K) | NLTE (K) | CO2 (K) | ILS (K) | Gain (K) | Spectro (K) | Offset (K) | Noise (K) | Random (K) | Syst (K) |
|---------------|----------|----------|---------|---------|----------|-------------|------------|-----------|------------|----------|
| 20            | 226.0    | <0.1     | <0.1    | 0.1     | 0.5      | 0.4         | <0.1       | 0.3       | 0.5        | 0.5      |
| 30            | 219.6    | <0.1     | <0.1    | 0.4     | 0.4      | 0.3         | <0.1       | 0.3       | 0.4        | 0.6      |
| 40            | 219.2    | <0.1     | <0.1    | 0.1     | 0.4      | 0.2         | 0.1        | 0.3       | 0.4        | 0.5      |
| 50            | 226.8    | <0.1     | <0.1    | 0.4     | 0.4      | 0.2         | 0.1        | 0.5       | 0.6        | 0.6      |
| 60            | 224.0    | <0.1     | <0.1    | 0.4     | 0.3      | 0.6         | 0.2        | 1.0       | 1.1        | 0.7      |
| 70            | 226.6    | 0.7      | 0.3     | 0.3     | 0.2      | 0.7         | 0.7        | 2.5       | 2.6        | 1.1      |
| 80            | 232.1    | 2.9      | <0.1    | 0.3     | 0.4      | 0.7         | 1.2        | 4.4       | 4.8        | 2.7      |
| 90            | 219.7    | 3.3      | 2.0     | 0.6     | 0.4      | 0.5         | 1.3        | 5.3       | 5.7        | 3.6      |
| 100           | 199.7    | 4.6      | 1.0     | 0.7     | 0.8      | 0.4         | 1.6        | 7.3       | 7.8        | 4.3      |
| 110           | 254.2    | 21.4     | 7.7     | 1.9     | 0.9      | 0.5         | 4.8        | 19.3      | 22.9       | 19.8     |
| 115           | 320.4    | 26.7     | 10.9    | 2.7     | 0.9      | 0.7         | 6.7        | 26.9      | 31.0       | 25.5     |

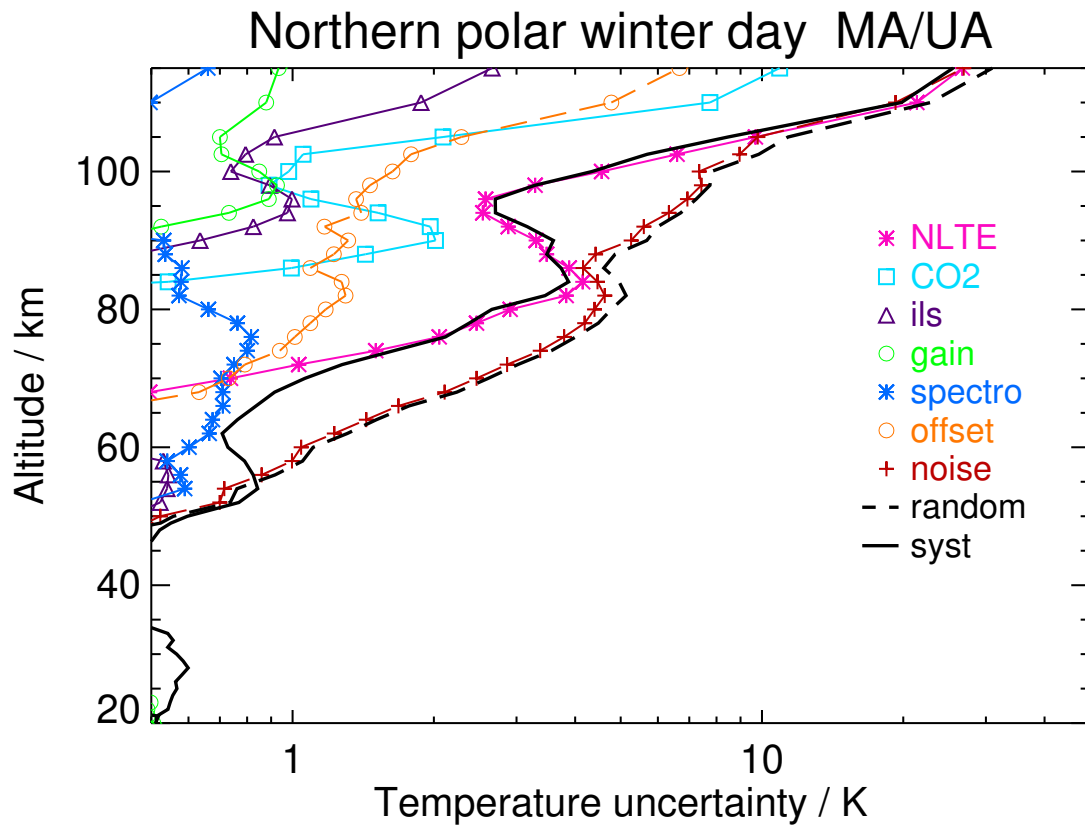

**Figure S1.** Temperature uncertainties for Northern polar winter daytime conditions. Values for selected altitudes are given in Table S2.

**Table S3.** Temperature error budget for Northern polar winter night. All uncertainties are  $1\sigma$ .

| Altitude (km) | Mean (K) | NLTE (K) | CO2 (K) | ILS (K) | Gain (K) | Spectro (K) | Offset (K) | Noise (K) | Random (K) | Syst (K) |
|---------------|----------|----------|---------|---------|----------|-------------|------------|-----------|------------|----------|
| 20            | 208.1    | <0.1     | <0.1    | 0.2     | 0.4      | 0.4         | <0.1       | 0.3       | 0.4        | 0.6      |
| 30            | 208.7    | <0.1     | <0.1    | 0.4     | 0.4      | 0.6         | <0.1       | 0.3       | 0.6        | 0.6      |
| 40            | 225.3    | <0.1     | <0.1    | 0.1     | 0.4      | 0.5         | 0.1        | 0.4       | 0.6        | 0.6      |
| 50            | 253.9    | <0.1     | <0.1    | 0.5     | 0.4      | 0.3         | 0.1        | 0.5       | 0.6        | 0.6      |
| 60            | 246.3    | 0.2      | <0.1    | 0.3     | 0.3      | 0.8         | 0.2        | 0.9       | 1.0        | 0.9      |
| 70            | 230.2    | 0.7      | 0.3     | 0.3     | 0.2      | 0.9         | 0.8        | 2.3       | 2.5        | 1.2      |
| 80            | 218.4    | 2.1      | <0.1    | 0.5     | 0.3      | 0.7         | 1.1        | 4.4       | 4.8        | 1.7      |
| 90            | 207.3    | 2.8      | 1.8     | 1.0     | 0.5      | 0.3         | 1.4        | 5.5       | 6.0        | 2.9      |
| 100           | 195.7    | 5.8      | 1.2     | 0.9     | 0.9      | 0.3         | 1.8        | 7.6       | 8.3        | 5.3      |
| 110           | 247.2    | 19.1     | 8.5     | 1.6     | 0.7      | 0.5         | 5.6        | 21.7      | 24.4       | 18.6     |
| 115           | 301.0    | 22.7     | 11.0    | 2.2     | 0.8      | 0.6         | 7.1        | 28.3      | 31.5       | 22.5     |

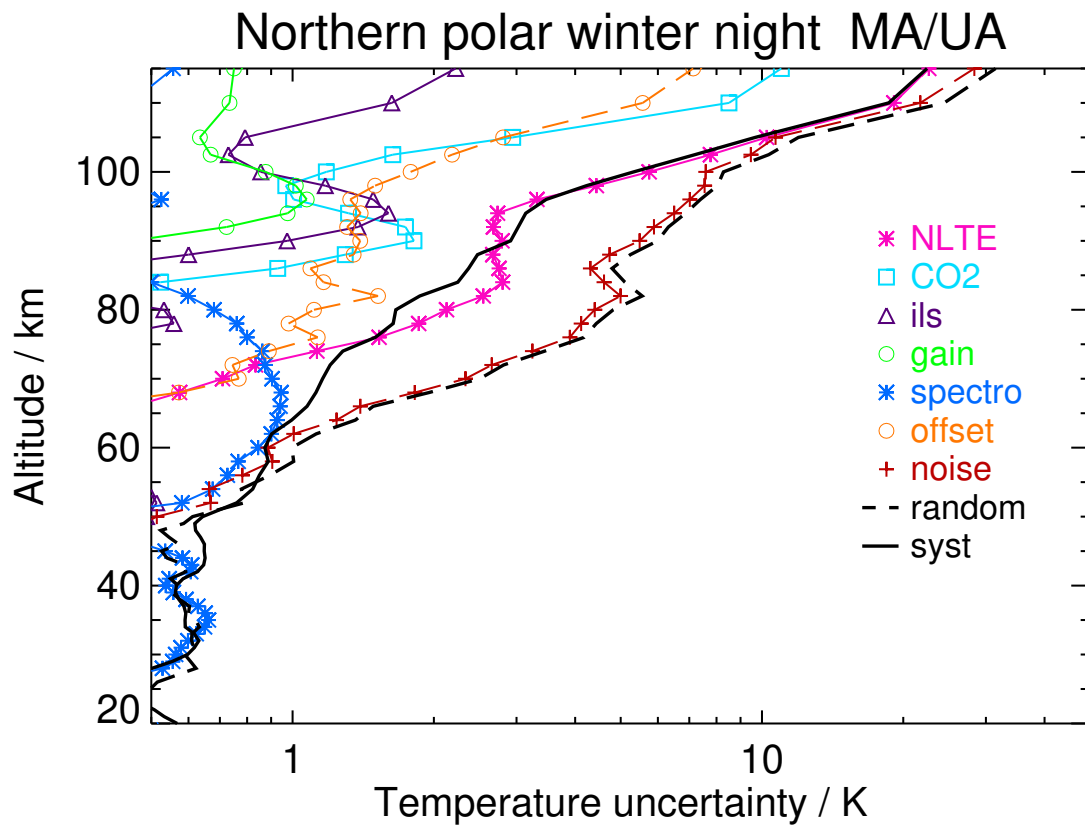

**Figure S2.** Temperature uncertainties for Northern polar winter nighttime conditions. Values for selected altitudes are given in Table S3.

**Table S4.** Temperature error budget for Northern polar spring day. All uncertainties are  $1\sigma$ .

| Altitude (km) | Mean (K) | NLTE (K) | CO2 (K) | ILS (K) | Gain (K) | Spectro (K) | Offset (K) | Noise (K) | Random (K) | Syst (K) |
|---------------|----------|----------|---------|---------|----------|-------------|------------|-----------|------------|----------|
| 20            | 215.4    | <0.1     | <0.1    | 0.2     | 0.4      | 0.2         | <0.1       | 0.4       | 0.4        | 0.4      |
| 30            | 216.9    | <0.1     | <0.1    | 0.5     | 0.3      | 0.5         | <0.1       | 0.3       | 0.4        | 0.7      |
| 40            | 248.1    | <0.1     | <0.1    | 0.2     | 0.4      | 0.7         | <0.1       | 0.3       | 0.5        | 0.8      |
| 50            | 270.1    | <0.1     | <0.1    | 0.5     | 0.3      | 0.4         | 0.1        | 0.4       | 0.5        | 0.7      |
| 60            | 254.7    | 0.1      | <0.1    | 0.3     | 0.2      | 1.0         | 0.2        | 0.7       | 0.8        | 1.0      |
| 70            | 222.2    | 0.2      | 0.2     | 0.4     | 0.2      | 0.9         | 0.8        | 2.2       | 2.4        | 1.0      |
| 80            | 199.6    | 0.5      | <0.1    | 0.6     | 0.2      | 0.6         | 0.9        | 4.4       | 4.6        | 0.7      |
| 90            | 179.9    | 1.0      | 1.2     | 0.9     | 0.4      | 0.2         | 1.4        | 5.8       | 6.0        | 1.6      |
| 100           | 181.4    | 7.6      | 1.7     | 0.8     | 1.3      | 0.8         | 2.4        | 8.2       | 8.9        | 7.5      |
| 110           | 283.4    | 31.1     | 7.6     | 4.1     | 1.2      | 0.8         | 5.7        | 20.7      | 23.0       | 31.2     |
| 115           | 354.7    | 37.8     | 10.0    | 5.8     | 1.2      | 0.9         | 7.8        | 27.7      | 30.4       | 38.4     |

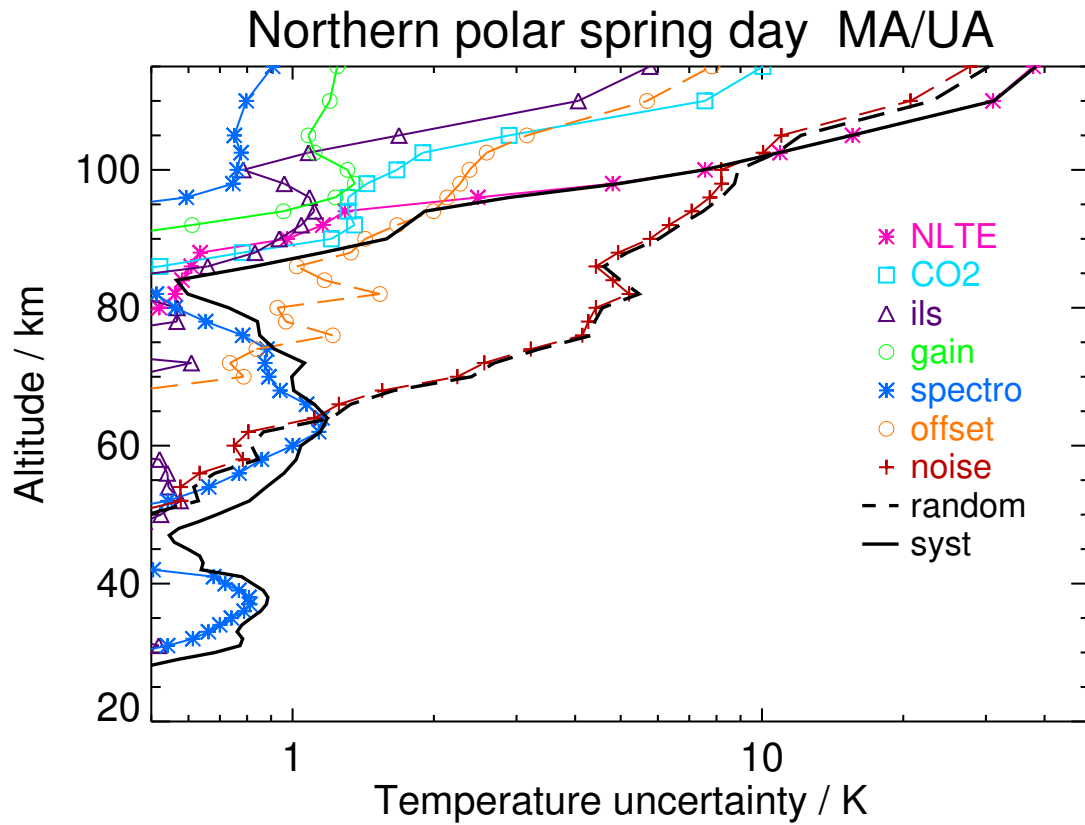**Figure S3.** Temperature uncertainties for Northern polar spring daytime conditions. Values for selected altitudes are given in Table S4.

**Table S5.** Temperature error budget for Northern polar spring night. All uncertainties are  $1\sigma$ .

| Altitude (km) | Mean (K) | NLTE (K) | CO2 (K) | ILS (K) | Gain (K) | Spectro (K) | Offset (K) | Noise (K) | Random (K) | Syst (K) |
|---------------|----------|----------|---------|---------|----------|-------------|------------|-----------|------------|----------|
| 20            | 215.8    | <0.1     | <0.1    | 0.2     | 0.4      | 0.2         | <0.1       | 0.3       | 0.4        | 0.4      |
| 30            | 218.0    | <0.1     | <0.1    | 0.5     | 0.3      | 0.5         | <0.1       | 0.3       | 0.4        | 0.7      |
| 40            | 247.8    | <0.1     | <0.1    | 0.2     | 0.4      | 0.7         | <0.1       | 0.3       | 0.4        | 0.8      |
| 50            | 265.9    | <0.1     | <0.1    | 0.5     | 0.3      | 0.4         | 0.1        | 0.4       | 0.5        | 0.7      |
| 60            | 249.5    | 0.1      | <0.1    | 0.2     | 0.2      | 1.0         | 0.3        | 0.8       | 0.8        | 1.0      |
| 70            | 221.4    | 0.2      | 0.2     | 0.5     | 0.2      | 1.0         | 0.8        | 2.3       | 2.4        | 1.1      |
| 80            | 200.3    | 0.6      | <0.1    | 0.6     | 0.2      | 0.7         | 1.0        | 4.5       | 4.7        | 0.9      |
| 90            | 189.5    | 1.6      | 1.2     | 1.2     | 0.4      | 0.2         | 1.5        | 5.8       | 6.1        | 2.1      |
| 100           | 189.7    | 8.4      | 1.3     | 0.7     | 1.3      | 0.7         | 2.0        | 7.9       | 8.6        | 8.2      |
| 110           | 271.8    | 30.6     | 6.7     | 2.8     | 0.9      | 0.6         | 4.7        | 18.4      | 22.1       | 29.4     |
| 115           | 332.6    | 38.1     | 9.6     | 4.2     | 0.9      | 0.7         | 6.8        | 26.5      | 30.7       | 37.0     |

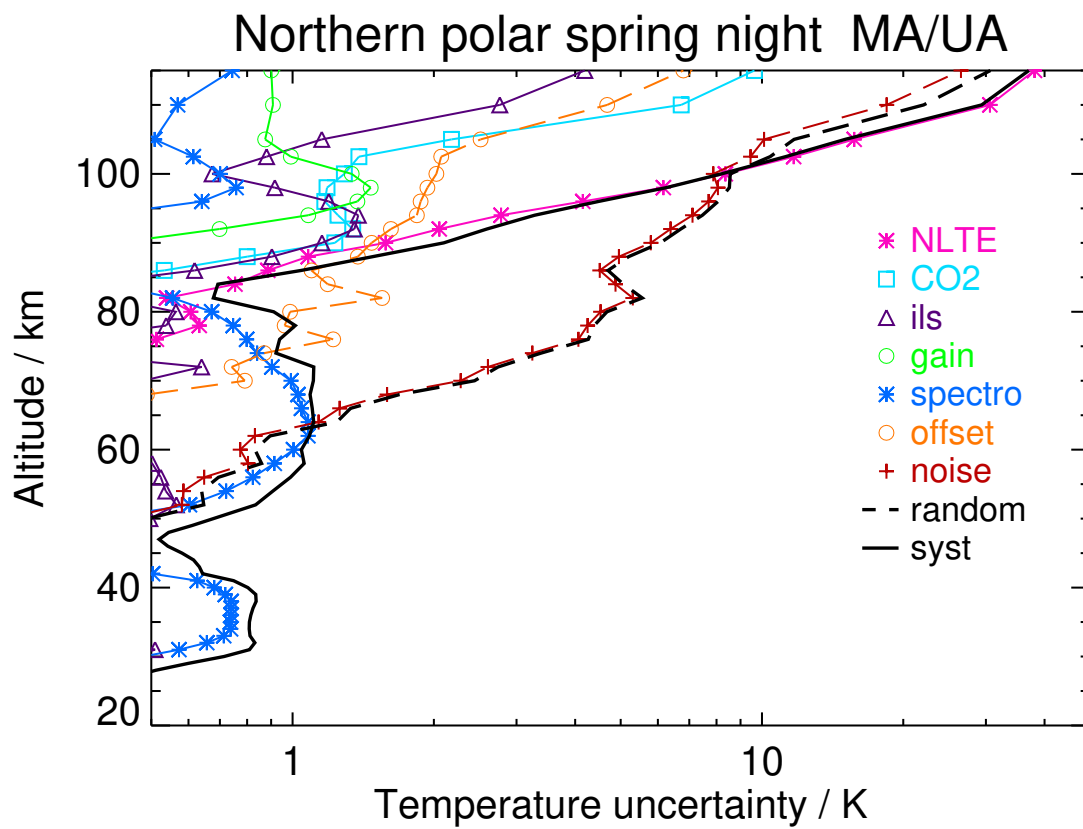

**Figure S4.** Temperature uncertainties for Northern polar spring nighttime conditions. Values for selected altitudes are given in Table S5.

**Table S6.** Temperature error budget for Northern polar summer day. All uncertainties are  $1\sigma$ .

| Altitude (km) | Mean (K) | NLTE (K) | CO2 (K) | ILS (K) | Gain (K) | Spectro (K) | Offset (K) | Noise (K) | Random (K) | Syst (K) |
|---------------|----------|----------|---------|---------|----------|-------------|------------|-----------|------------|----------|
| 20            | 228.5    | <0.1     | <0.1    | 0.2     | 0.4      | 0.1         | <0.1       | 0.3       | 0.4        | 0.4      |
| 30            | 236.0    | <0.1     | <0.1    | 0.5     | 0.3      | 0.3         | <0.1       | 0.2       | 0.3        | 0.7      |
| 40            | 260.9    | <0.1     | <0.1    | 0.3     | 0.4      | 0.5         | <0.1       | 0.3       | 0.3        | 0.7      |
| 50            | 278.0    | <0.1     | <0.1    | 0.5     | 0.3      | 0.2         | 0.1        | 0.4       | 0.4        | 0.6      |
| 60            | 262.4    | <0.1     | <0.1    | 0.3     | 0.2      | 1.0         | 0.2        | 0.7       | 0.7        | 1.1      |
| 70            | 218.3    | <0.1     | 0.1     | 0.6     | 0.2      | 1.2         | 0.8        | 2.0       | 2.2        | 1.3      |
| 80            | 157.9    | 1.2      | 0.4     | 0.8     | 0.2      | 0.6         | 1.0        | 5.2       | 5.4        | 1.5      |
| 90            | 141.0    | 1.1      | 1.0     | 0.5     | 0.3      | 0.1         | 2.3        | 6.2       | 6.7        | 1.4      |
| 100           | 228.8    | 22.5     | 6.5     | 1.5     | 1.3      | 0.7         | 2.4        | 8.4       | 11.2       | 22.4     |
| 110           | 323.6    | 43.0     | 17.5    | 6.0     | 1.6      | 0.9         | 6.3        | 23.1      | 25.6       | 46.0     |
| 115           | 368.9    | 46.8     | 20.4    | 7.5     | 1.7      | 1.0         | 8.1        | 28.8      | 31.2       | 50.8     |

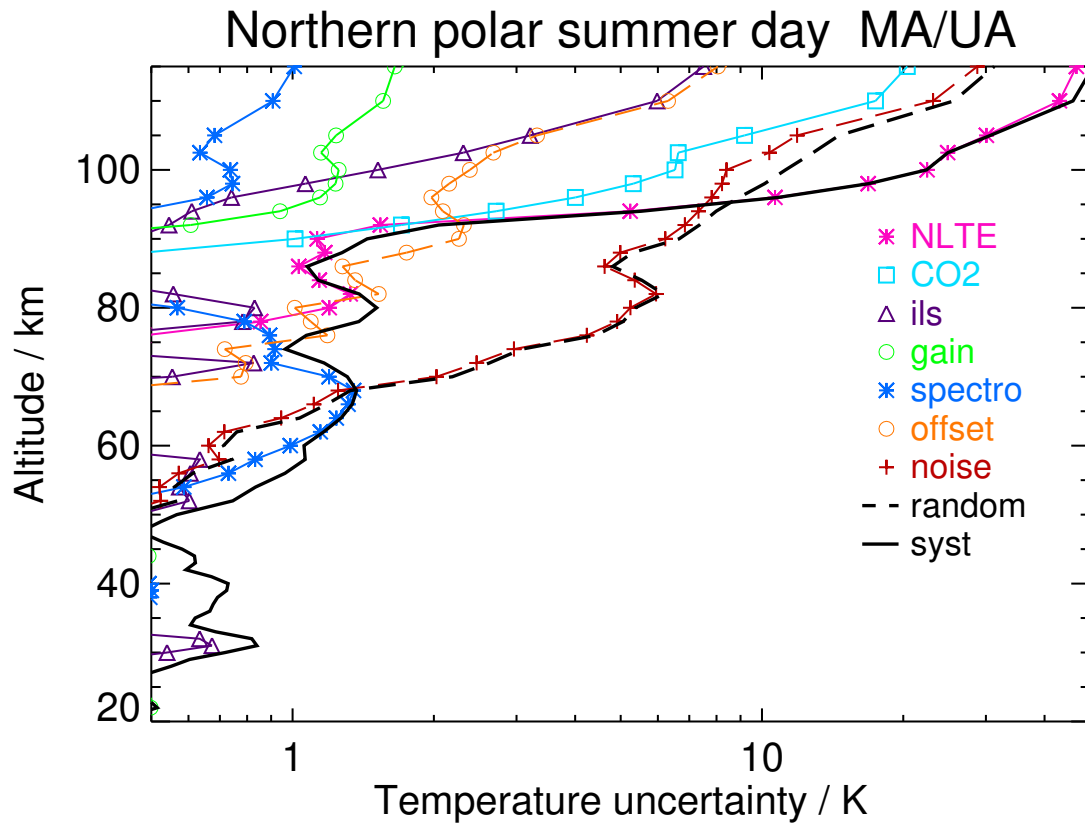**Figure S5.** Temperature uncertainties for Northern polar summer daytime conditions. Values for selected altitudes are given in Table S6.



**Table S7.** Temperature error budget for Northern polar summer night. All uncertainties are  $1\sigma$ .

| Altitude (km) | Mean (K) | NLTE (K) | CO2 (K) | ILS (K) | Gain (K) | Spectro (K) | Offset (K) | Noise (K) | Random (K) | Syst (K) |
|---------------|----------|----------|---------|---------|----------|-------------|------------|-----------|------------|----------|
| 20            | 223.4    | <0.1     | <0.1    | 0.1     | 0.4      | 0.2         | <0.1       | 0.3       | 0.4        | 0.4      |
| 30            | 229.0    | <0.1     | <0.1    | 0.5     | 0.4      | 0.3         | <0.1       | 0.3       | 0.3        | 0.7      |
| 40            | 250.7    | <0.1     | <0.1    | 0.3     | 0.4      | 0.5         | <0.1       | 0.3       | 0.3        | 0.7      |
| 50            | 266.2    | <0.1     | <0.1    | 0.5     | 0.3      | 0.3         | 0.1        | 0.4       | 0.5        | 0.6      |
| 60            | 249.4    | <0.1     | <0.1    | 0.3     | 0.2      | 1.1         | 0.2        | 0.7       | 0.8        | 1.1      |
| 70            | 210.1    | <0.1     | 0.1     | 0.6     | 0.1      | 1.0         | 0.8        | 2.4       | 2.5        | 1.2      |
| 80            | 171.6    | 0.7      | 0.2     | 0.4     | 0.2      | 0.5         | 1.2        | 5.3       | 5.4        | 0.8      |
| 90            | 172.5    | 1.0      | 1.1     | 1.5     | 0.7      | 0.2         | 1.9        | 6.3       | 6.6        | 2.0      |
| 100           | 210.5    | 13.2     | 2.5     | 0.4     | 0.9      | 0.4         | 1.9        | 7.7       | 8.4        | 13.2     |
| 110           | 290.9    | 35.4     | 12.7    | 3.4     | 1.1      | 0.7         | 5.2        | 21.3      | 23.7       | 36.6     |
| 115           | 350.6    | 40.8     | 16.3    | 4.9     | 1.1      | 0.8         | 7.0        | 28.1      | 30.8       | 42.9     |

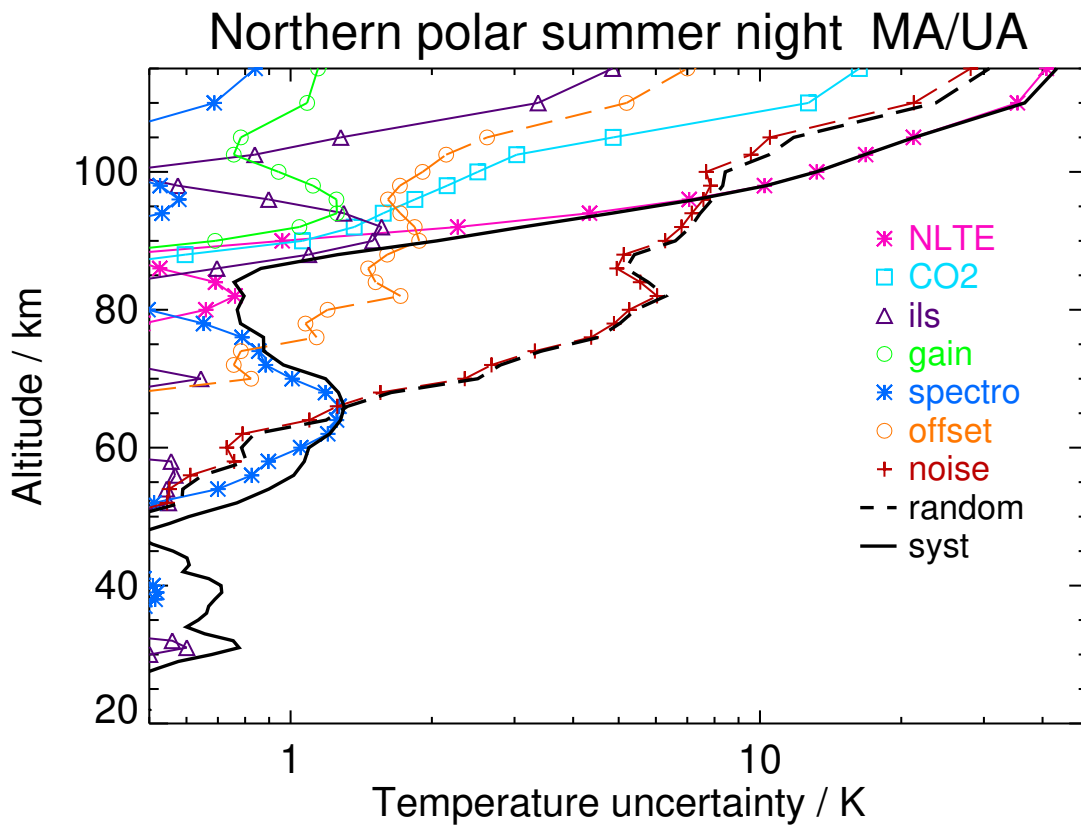

**Figure S6.** Temperature uncertainties for Northern polar summer nighttime conditions. Values for selected altitudes are given in Table S7.

**Table S8.** Temperature error budget for Northern polar autumn day. All uncertainties are  $1\sigma$ .

| Altitude (km) | Mean (K) | NLTE (K) | CO2 (K) | ILS (K) | Gain (K) | Spectro (K) | Offset (K) | Noise (K) | Random (K) | Syst (K) |
|---------------|----------|----------|---------|---------|----------|-------------|------------|-----------|------------|----------|
| 20            | 215.0    | <0.1     | <0.1    | 0.2     | 0.4      | 0.4         | <0.1       | 0.4       | 0.4        | 0.5      |
| 30            | 214.3    | <0.1     | <0.1    | 0.4     | 0.4      | 0.2         | <0.1       | 0.3       | 0.4        | 0.6      |
| 40            | 233.1    | <0.1     | <0.1    | 0.2     | 0.4      | 0.5         | 0.1        | 0.3       | 0.4        | 0.6      |
| 50            | 252.7    | <0.1     | <0.1    | 0.5     | 0.4      | 0.3         | 0.1        | 0.5       | 0.5        | 0.6      |
| 60            | 244.4    | 0.1      | <0.1    | 0.3     | 0.3      | 0.9         | 0.3        | 0.8       | 0.9        | 1.0      |
| 70            | 224.7    | 0.4      | 0.3     | 0.4     | 0.2      | 0.9         | 0.8        | 2.4       | 2.5        | 1.0      |
| 80            | 204.5    | 0.7      | <0.1    | 0.4     | 0.2      | 0.6         | 0.9        | 4.4       | 4.5        | 0.9      |
| 90            | 192.8    | 1.1      | 1.4     | 0.8     | 0.3      | 0.2         | 1.4        | 5.8       | 6.0        | 1.7      |
| 100           | 187.9    | 5.6      | 1.0     | 1.1     | 1.2      | 0.7         | 1.9        | 7.5       | 8.0        | 5.6      |
| 110           | 243.2    | 20.2     | 5.4     | 2.0     | 0.8      | 0.5         | 5.4        | 20.8      | 23.4       | 18.9     |
| 115           | 301.5    | 24.7     | 7.2     | 2.9     | 0.8      | 0.6         | 7.0        | 28.0      | 31.0       | 23.2     |

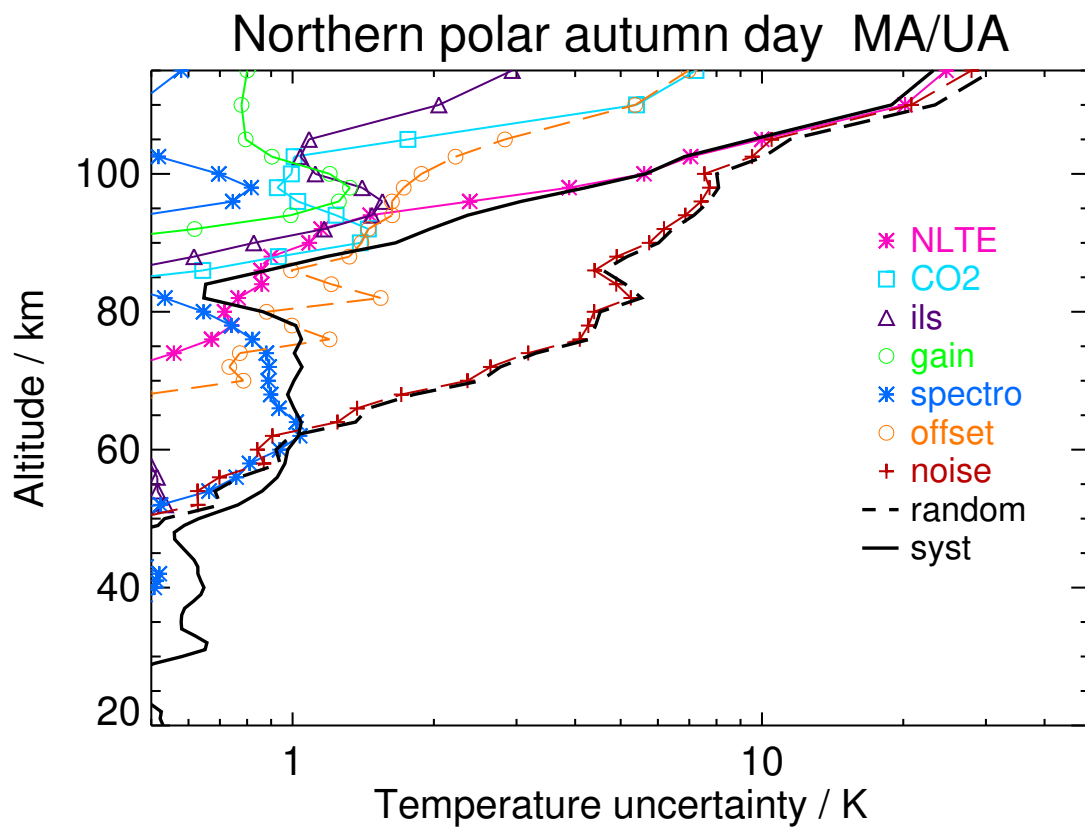**Figure S7.** Temperature uncertainties for Northern polar autumn daytime conditions. Values for selected altitudes are given in Table S8.

**Table S9.** Temperature error budget for Northern polar autumn night. All uncertainties are  $1\sigma$ .

| Altitude (km) | Mean (K) | NLTE (K) | CO2 (K) | ILS (K) | Gain (K) | Spectro (K) | Offset (K) | Noise (K) | Random (K) | Syst (K) |
|---------------|----------|----------|---------|---------|----------|-------------|------------|-----------|------------|----------|
| 20            | 212.9    | <0.1     | <0.1    | 0.2     | 0.4      | 0.4         | <0.1       | 0.3       | 0.4        | 0.6      |
| 30            | 211.0    | <0.1     | <0.1    | 0.4     | 0.4      | 0.2         | <0.1       | 0.3       | 0.3        | 0.6      |
| 40            | 229.1    | <0.1     | <0.1    | 0.1     | 0.4      | 0.6         | 0.1        | 0.4       | 0.5        | 0.7      |
| 50            | 252.4    | <0.1     | <0.1    | 0.5     | 0.4      | 0.3         | 0.1        | 0.5       | 0.6        | 0.6      |
| 60            | 249.4    | 0.2      | <0.1    | 0.2     | 0.3      | 0.9         | 0.2        | 0.8       | 0.9        | 1.0      |
| 70            | 228.4    | 0.5      | 0.3     | 0.4     | 0.2      | 1.0         | 0.8        | 2.3       | 2.5        | 1.1      |
| 80            | 206.8    | 1.0      | <0.1    | 0.5     | 0.2      | 0.7         | 1.1        | 4.6       | 4.8        | 1.1      |
| 90            | 196.4    | 1.4      | 1.4     | 0.9     | 0.4      | 0.2         | 1.4        | 5.6       | 5.9        | 2.0      |
| 100           | 191.1    | 6.2      | 1.0     | 0.9     | 1.1      | 0.5         | 1.8        | 7.6       | 8.1        | 6.1      |
| 110           | 244.4    | 19.1     | 5.9     | 1.4     | 0.7      | 0.4         | 5.0        | 20.3      | 22.3       | 18.5     |
| 115           | 301.2    | 23.7     | 8.3     | 2.2     | 0.7      | 0.5         | 6.6        | 27.7      | 30.1       | 23.3     |

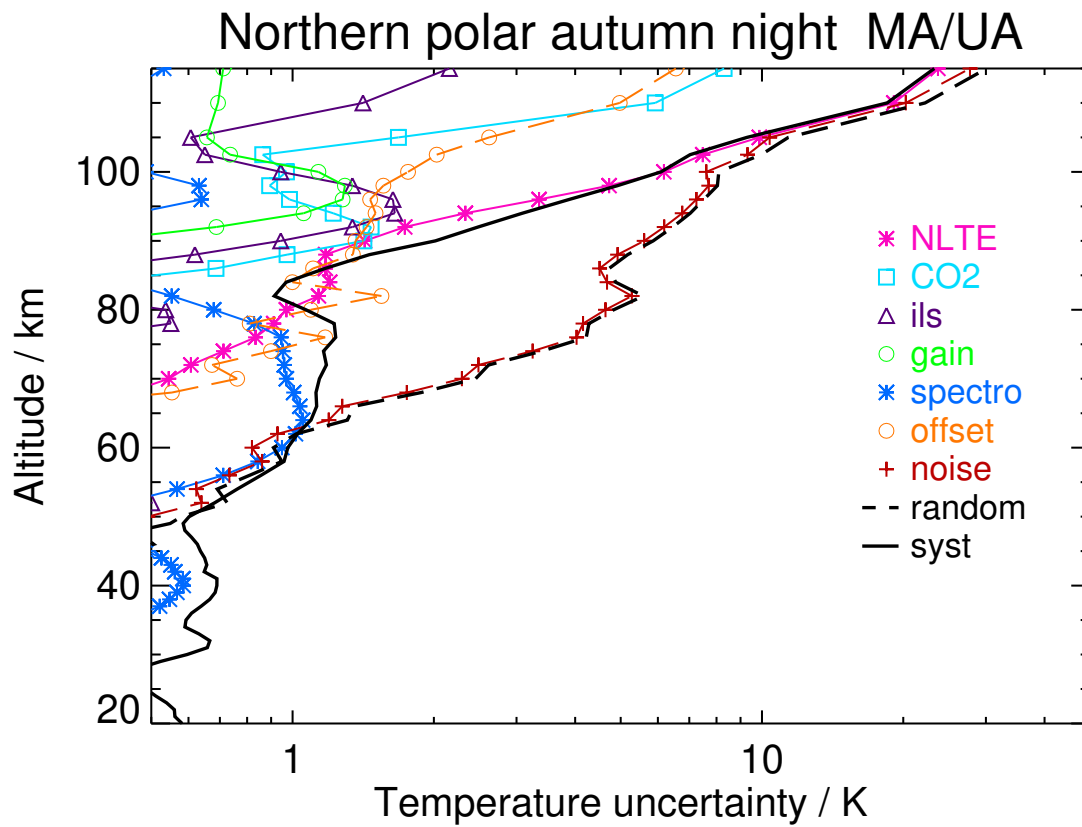

**Figure S8.** Temperature uncertainties for Northern polar autumn nighttime conditions. Values for selected altitudes are given in Table S9.

**Table S10.** Temperature error budget for Northern midlatitude winter day. All uncertainties are  $1\sigma$ .

| Altitude<br>(km) | Mean<br>(K) | NLTE<br>(K) | CO2<br>(K) | ILS<br>(K) | Gain<br>(K) | Spectro<br>(K) | Offset<br>(K) | Noise<br>(K) | Random<br>(K) | Syst<br>(K) |
|------------------|-------------|-------------|------------|------------|-------------|----------------|---------------|--------------|---------------|-------------|
| 20               | 215.0       | <0.1        | <0.1       | 0.1        | 0.5         | 0.2            | <0.1          | 0.3          | 0.4           | 0.5         |
| 30               | 221.0       | <0.1        | <0.1       | 0.4        | 0.3         | 0.4            | <0.1          | 0.3          | 0.4           | 0.6         |
| 40               | 236.2       | <0.1        | <0.1       | 0.1        | 0.4         | 0.4            | <0.1          | 0.3          | 0.4           | 0.5         |
| 50               | 251.7       | <0.1        | <0.1       | 0.5        | 0.3         | 0.4            | 0.1           | 0.5          | 0.5           | 0.7         |
| 60               | 238.0       | <0.1        | <0.1       | 0.3        | 0.2         | 1.0            | 0.2           | 0.8          | 0.9           | 1.0         |
| 70               | 218.0       | 0.2         | 0.2        | 0.5        | 0.2         | 0.9            | 0.7           | 2.4          | 2.5           | 1.0         |
| 80               | 207.6       | 0.9         | 0.1        | 0.6        | 0.2         | 0.7            | 1.3           | 4.7          | 4.9           | 1.0         |
| 90               | 198.0       | 1.8         | 1.6        | 0.9        | 0.4         | 0.3            | 1.4           | 5.6          | 6.0           | 2.0         |
| 100              | 199.7       | 6.9         | 1.4        | 0.6        | 1.0         | 0.5            | 1.9           | 7.3          | 8.0           | 6.6         |
| 110              | 250.2       | 24.0        | 7.7        | 2.5        | 1.0         | 0.6            | 5.1           | 19.9         | 23.8          | 22.3        |
| 115              | 313.1       | 29.0        | 10.3       | 3.7        | 1.0         | 0.8            | 7.0           | 27.4         | 31.6          | 27.6        |

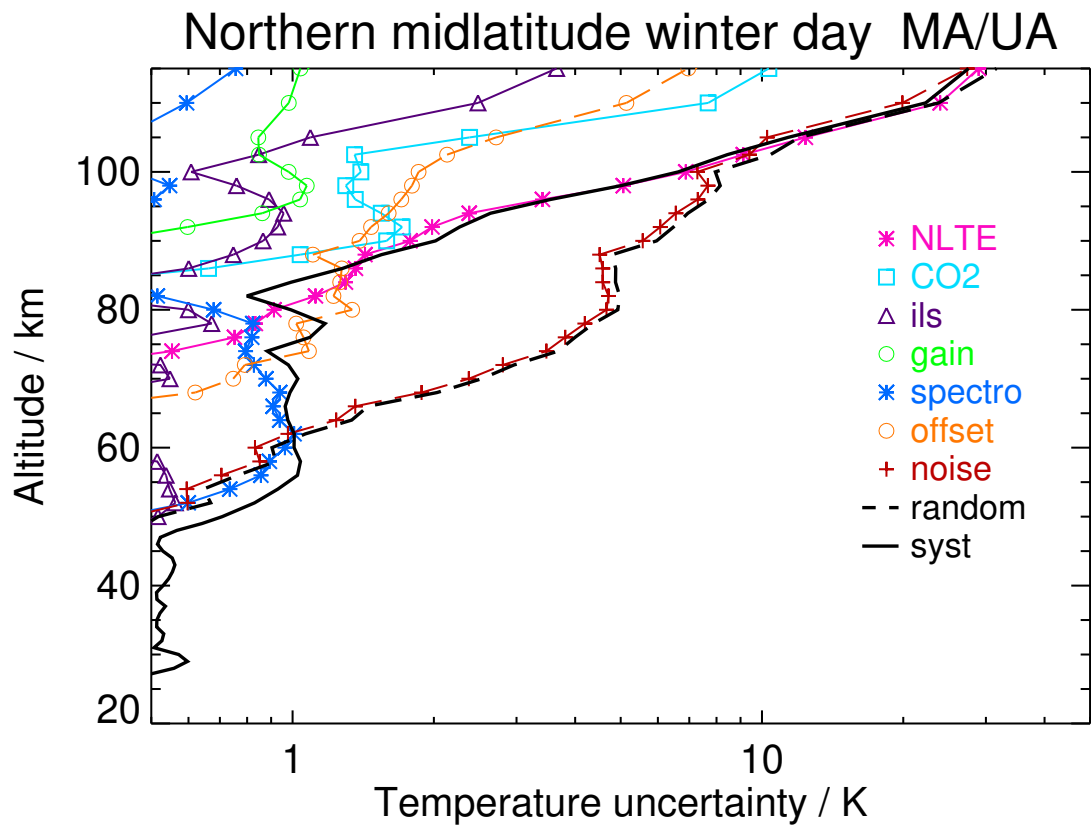**Figure S9.** Temperature uncertainties for Northern midlatitude winter daytime conditions. Values for selected altitudes are given in Table S10.

**Table S11.** Temperature error budget for Northern midlatitude winter night. All uncertainties are  $1\sigma$ .

| Altitude (km) | Mean (K) | NLTE (K) | CO2 (K) | ILS (K) | Gain (K) | Spectro (K) | Offset (K) | Noise (K) | Random (K) | Syst (K) |
|---------------|----------|----------|---------|---------|----------|-------------|------------|-----------|------------|----------|
| 20            | 216.8    | <0.1     | <0.1    | 0.2     | 0.4      | 0.3         | <0.1       | 0.2       | 0.4        | 0.5      |
| 30            | 221.4    | <0.1     | <0.1    | 0.5     | 0.4      | 0.4         | <0.1       | 0.3       | 0.4        | 0.7      |
| 40            | 240.2    | <0.1     | <0.1    | 0.2     | 0.4      | 0.6         | <0.1       | 0.3       | 0.4        | 0.7      |
| 50            | 251.1    | <0.1     | <0.1    | 0.5     | 0.3      | 0.5         | 0.1        | 0.5       | 0.6        | 0.7      |
| 60            | 234.4    | 0.1      | <0.1    | 0.4     | 0.3      | 0.9         | 0.2        | 0.9       | 1.0        | 1.0      |
| 70            | 221.3    | 0.4      | 0.3     | 0.5     | 0.2      | 0.8         | 0.7        | 2.3       | 2.4        | 1.0      |
| 80            | 215.1    | 1.7      | <0.1    | 0.5     | 0.3      | 0.7         | 1.1        | 4.4       | 4.7        | 1.6      |
| 90            | 197.3    | 2.1      | 1.5     | 1.0     | 0.4      | 0.3         | 1.5        | 5.7       | 6.1        | 2.4      |
| 100           | 195.4    | 6.9      | 1.3     | 0.5     | 0.9      | 0.5         | 1.8        | 7.4       | 8.1        | 6.5      |
| 110           | 241.6    | 19.9     | 8.3     | 1.6     | 0.6      | 0.5         | 5.4        | 21.0      | 24.5       | 18.3     |
| 115           | 304.3    | 24.5     | 11.1    | 2.5     | 0.6      | 0.6         | 7.0        | 27.9      | 32.1       | 23.1     |

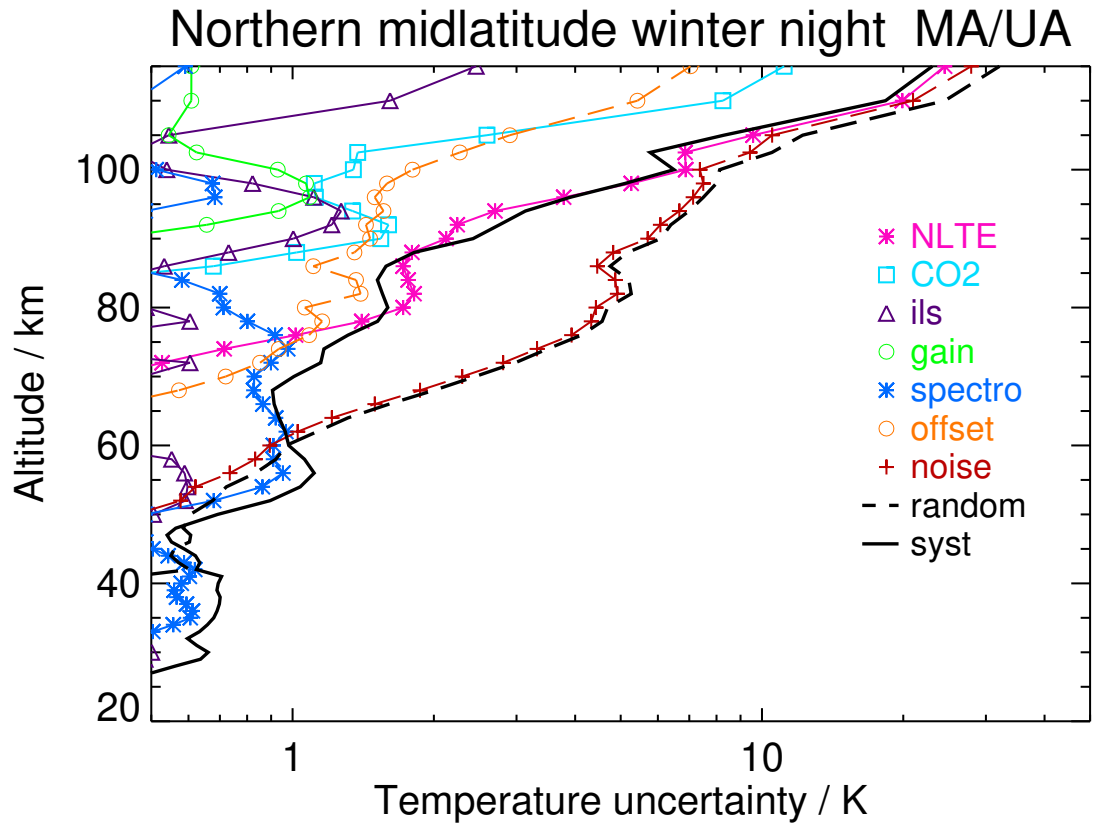

**Figure S10.** Temperature uncertainties for Northern midlatitude winter nighttime conditions. Values for selected altitudes are given in Table S11.

**Table S12.** Temperature error budget for Northern midlatitude spring day. All uncertainties are  $1\sigma$ .

| Altitude (km) | Mean (K) | NLTE (K) | CO2 (K) | ILS (K) | Gain (K) | Spectro (K) | Offset (K) | Noise (K) | Random (K) | Syst (K) |
|---------------|----------|----------|---------|---------|----------|-------------|------------|-----------|------------|----------|
| 20            | 215.4    | <0.1     | <0.1    | 0.2     | 0.3      | 0.2         | <0.1       | 0.3       | 0.4        | 0.4      |
| 30            | 226.6    | <0.1     | <0.1    | 0.5     | 0.3      | 0.4         | <0.1       | 0.3       | 0.4        | 0.7      |
| 40            | 252.6    | <0.1     | <0.1    | 0.3     | 0.4      | 0.5         | <0.1       | 0.3       | 0.4        | 0.7      |
| 50            | 262.3    | <0.1     | <0.1    | 0.5     | 0.3      | 0.4         | 0.1        | 0.4       | 0.5        | 0.7      |
| 60            | 243.2    | <0.1     | <0.1    | 0.3     | 0.2      | 1.0         | 0.3        | 0.8       | 0.9        | 1.1      |
| 70            | 216.1    | 0.1      | 0.2     | 0.5     | 0.2      | 0.9         | 0.7        | 2.3       | 2.4        | 1.0      |
| 80            | 187.7    | 0.6      | 0.1     | 0.6     | 0.2      | 0.6         | 0.9        | 4.7       | 4.8        | 0.9      |
| 90            | 182.2    | 1.2      | 1.2     | 1.0     | 0.4      | 0.2         | 1.5        | 5.9       | 6.2        | 1.6      |
| 100           | 191.9    | 9.3      | 1.7     | 0.5     | 1.1      | 0.7         | 2.3        | 7.8       | 8.7        | 9.0      |
| 110           | 260.4    | 27.1     | 5.4     | 3.0     | 1.1      | 0.7         | 5.2        | 19.5      | 22.3       | 26.1     |
| 115           | 315.5    | 32.5     | 7.3     | 4.5     | 1.2      | 0.8         | 6.9        | 27.1      | 30.3       | 31.5     |

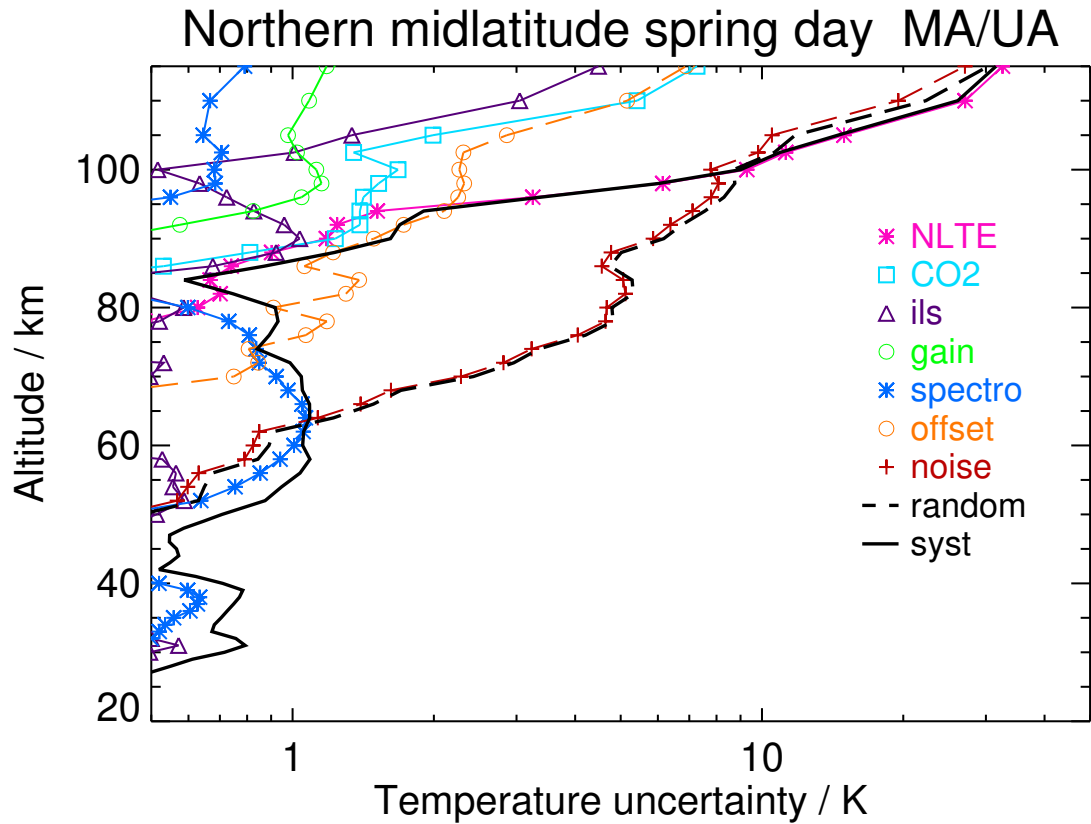**Figure S11.** Temperature uncertainties for Northern midlatitude spring daytime conditions. Values for selected altitudes are given in Table S12.

**Table S13.** Temperature error budget for Northern midlatitude spring night. All uncertainties are  $1\sigma$ .

| Altitude (km) | Mean (K) | NLTE (K) | CO2 (K) | ILS (K) | Gain (K) | Spectro (K) | Offset (K) | Noise (K) | Random (K) | Syst (K) |
|---------------|----------|----------|---------|---------|----------|-------------|------------|-----------|------------|----------|
| 20            | 215.8    | <0.1     | <0.1    | 0.2     | 0.3      | 0.2         | <0.1       | 0.3       | 0.4        | 0.4      |
| 30            | 222.6    | <0.1     | <0.1    | 0.5     | 0.3      | 0.5         | <0.1       | 0.3       | 0.4        | 0.7      |
| 40            | 249.8    | <0.1     | <0.1    | 0.2     | 0.4      | 0.6         | <0.1       | 0.3       | 0.4        | 0.7      |
| 50            | 263.7    | <0.1     | <0.1    | 0.5     | 0.3      | 0.4         | 0.1        | 0.4       | 0.5        | 0.7      |
| 60            | 243.8    | <0.1     | <0.1    | 0.3     | 0.2      | 1.0         | 0.3        | 0.8       | 0.9        | 1.1      |
| 70            | 216.2    | 0.2      | 0.2     | 0.5     | 0.2      | 0.9         | 0.8        | 2.3       | 2.5        | 1.1      |
| 80            | 195.5    | 0.6      | <0.1    | 0.4     | 0.2      | 0.6         | 1.0        | 4.6       | 4.8        | 0.7      |
| 90            | 182.4    | 1.4      | 1.2     | 1.0     | 0.4      | 0.2         | 1.7        | 6.1       | 6.4        | 1.8      |
| 100           | 195.1    | 9.6      | 1.4     | 0.6     | 1.2      | 0.7         | 2.0        | 7.9       | 8.6        | 9.5      |
| 110           | 265.2    | 28.4     | 5.7     | 2.7     | 0.9      | 0.5         | 4.4        | 17.9      | 20.7       | 27.5     |
| 115           | 311.7    | 34.1     | 8.1     | 4.1     | 1.0      | 0.7         | 6.2        | 26.2      | 29.2       | 33.5     |

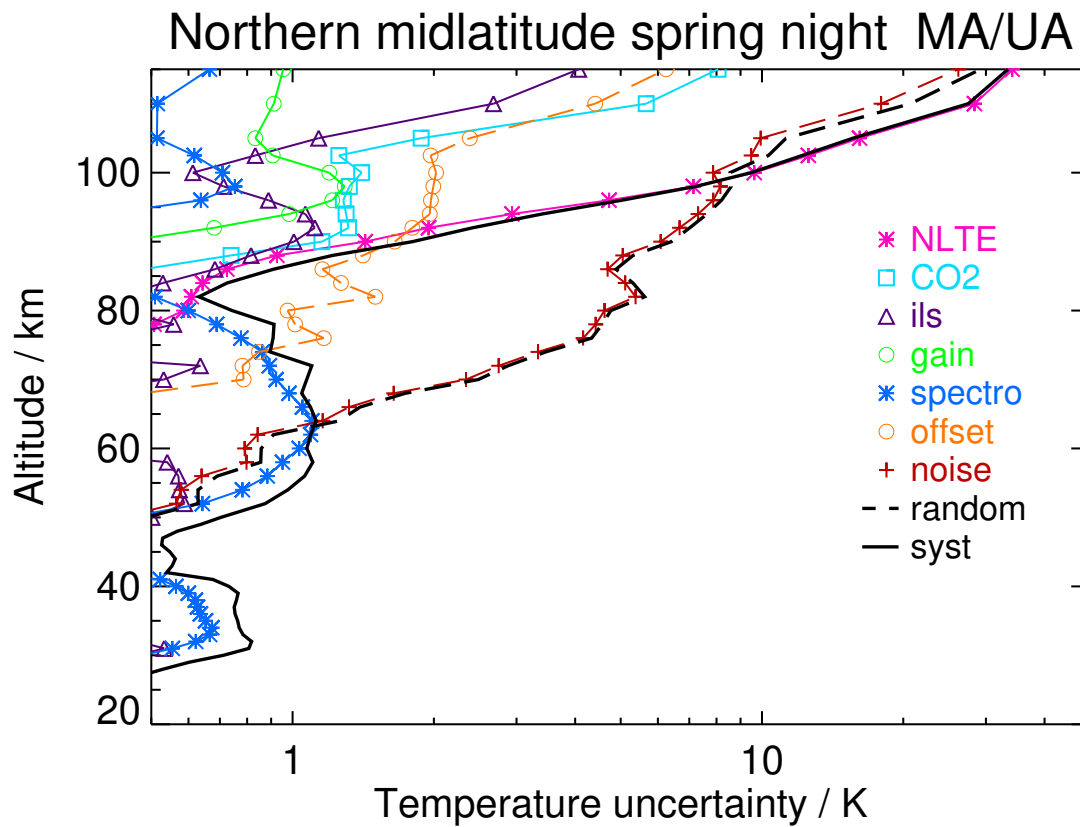

**Figure S12.** Temperature uncertainties for Northern midlatitude spring nighttime conditions. Values for selected altitudes are given in Table S13.

**Table S14.** Temperature error budget for Northern midlatitude summer day. All uncertainties are  $1\sigma$ .

| Altitude (km) | Mean (K) | NLTE (K) | CO2 (K) | ILS (K) | Gain (K) | Spectro (K) | Offset (K) | Noise (K) | Random (K) | Syst (K) |
|---------------|----------|----------|---------|---------|----------|-------------|------------|-----------|------------|----------|
| 20            | 221.5    | <0.1     | <0.1    | 0.2     | 0.4      | 0.1         | <0.1       | 0.3       | 0.4        | 0.4      |
| 30            | 232.7    | <0.1     | <0.1    | 0.5     | 0.4      | 0.4         | <0.1       | 0.3       | 0.3        | 0.7      |
| 40            | 256.0    | <0.1     | <0.1    | 0.3     | 0.5      | 0.5         | <0.1       | 0.3       | 0.3        | 0.7      |
| 50            | 267.0    | <0.1     | <0.1    | 0.5     | 0.3      | 0.3         | 0.1        | 0.4       | 0.5        | 0.7      |
| 60            | 246.1    | <0.1     | <0.1    | 0.3     | 0.2      | 1.1         | 0.3        | 0.8       | 0.8        | 1.2      |
| 70            | 204.8    | 0.2      | 0.1     | 0.6     | 0.2      | 0.9         | 0.8        | 2.4       | 2.5        | 1.1      |
| 80            | 165.0    | 1.1      | 0.2     | 0.5     | 0.2      | 0.4         | 1.0        | 5.1       | 5.2        | 1.1      |
| 90            | 169.3    | 1.0      | 1.1     | 1.3     | 0.6      | 0.2         | 1.8        | 6.1       | 6.5        | 1.8      |
| 100           | 210.3    | 14.0     | 3.8     | 0.5     | 0.8      | 0.4         | 2.0        | 7.6       | 8.9        | 14.0     |
| 110           | 311.4    | 39.1     | 16.9    | 4.0     | 1.2      | 0.8         | 5.6        | 21.9      | 25.5       | 41.1     |
| 115           | 374.8    | 43.7     | 20.2    | 5.4     | 1.3      | 0.9         | 7.5        | 27.8      | 31.4       | 46.8     |

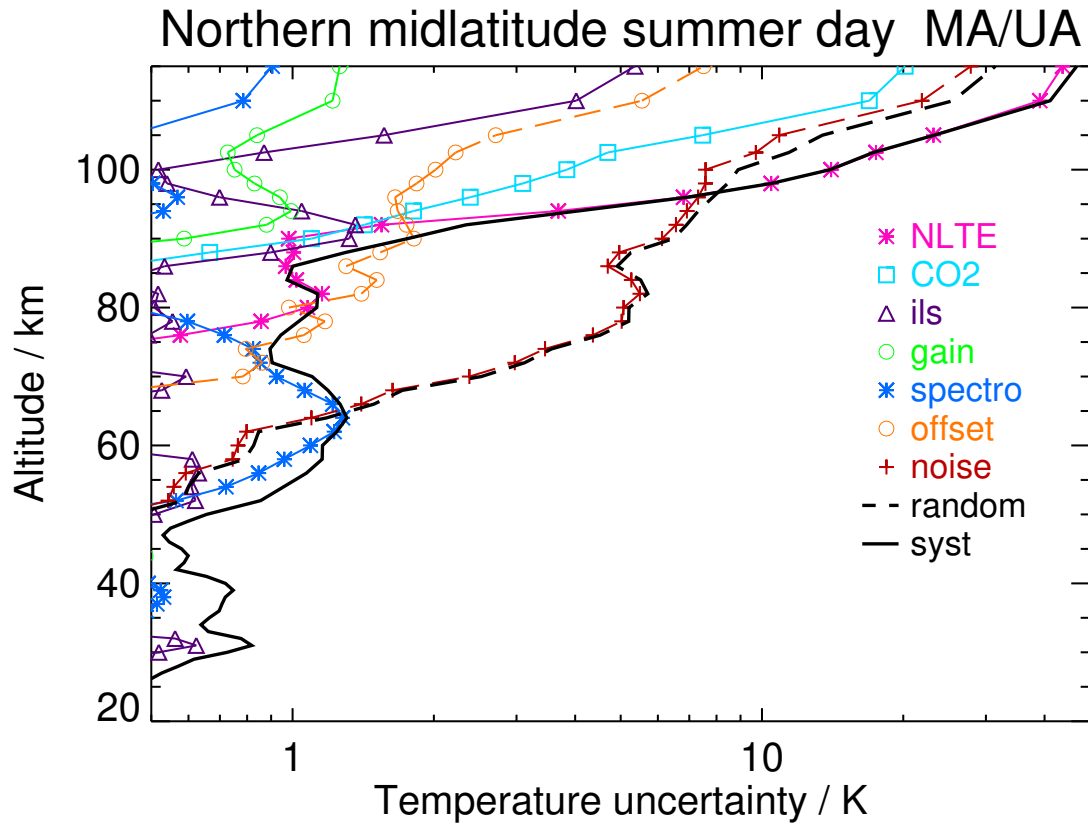**Figure S13.** Temperature uncertainties for Northern midlatitude summer daytime conditions. Values for selected altitudes are given in Table S14.



**Table S15.** Temperature error budget for Northern midlatitude summer night. All uncertainties are  $1\sigma$ .

| Altitude (km) | Mean (K) | NLTE (K) | CO2 (K) | ILS (K) | Gain (K) | Spectro (K) | Offset (K) | Noise (K) | Random (K) | Syst (K) |
|---------------|----------|----------|---------|---------|----------|-------------|------------|-----------|------------|----------|
| 20            | 221.4    | <0.1     | <0.1    | 0.2     | 0.3      | 0.1         | <0.1       | 0.3       | 0.4        | 0.4      |
| 30            | 233.6    | <0.1     | <0.1    | 0.5     | 0.3      | 0.4         | <0.1       | 0.3       | 0.3        | 0.7      |
| 40            | 257.7    | <0.1     | <0.1    | 0.3     | 0.5      | 0.5         | <0.1       | 0.3       | 0.3        | 0.7      |
| 50            | 267.5    | <0.1     | <0.1    | 0.5     | 0.3      | 0.4         | 0.1        | 0.4       | 0.5        | 0.6      |
| 60            | 245.9    | <0.1     | <0.1    | 0.3     | 0.2      | 1.1         | 0.3        | 0.7       | 0.8        | 1.1      |
| 70            | 205.9    | <0.1     | 0.1     | 0.7     | 0.2      | 0.9         | 0.8        | 2.4       | 2.6        | 1.1      |
| 80            | 171.0    | 0.7      | 0.2     | 0.5     | 0.2      | 0.5         | 1.2        | 5.3       | 5.5        | 0.8      |
| 90            | 172.6    | 1.4      | 1.1     | 1.1     | 0.5      | 0.2         | 1.9        | 6.3       | 6.7        | 1.9      |
| 100           | 204.8    | 12.3     | 3.1     | 0.4     | 0.8      | 0.4         | 2.0        | 7.6       | 8.4        | 12.4     |
| 110           | 274.8    | 29.7     | 11.2    | 3.2     | 1.0      | 0.6         | 5.1        | 21.1      | 23.2       | 30.9     |
| 115           | 330.4    | 34.6     | 14.4    | 4.6     | 1.1      | 0.7         | 6.6        | 28.0      | 30.4       | 36.5     |

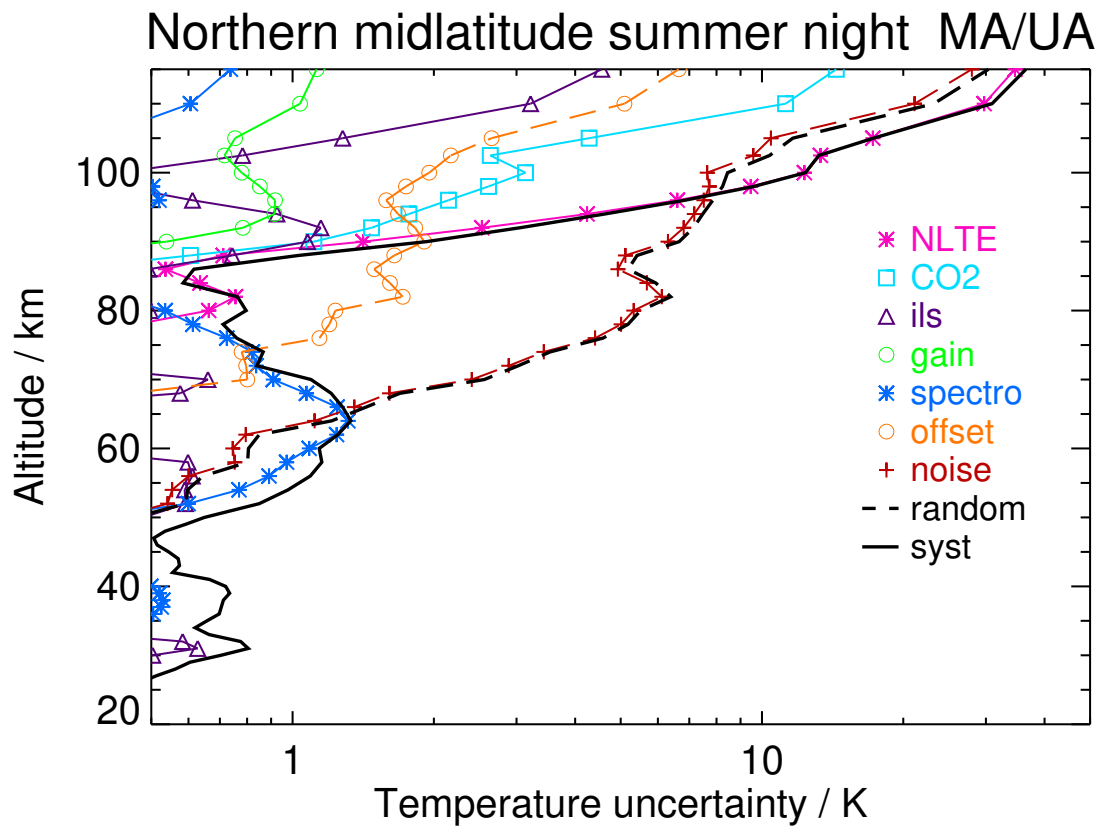

**Figure S14.** Temperature uncertainties for Northern midlatitude summer nighttime conditions. Values for selected altitudes are given in Table S15.

**Table S16.** Temperature error budget for Northern midlatitude autumn day. All uncertainties are  $1\sigma$ .

| Altitude (km) | Mean (K) | NLTE (K) | CO2 (K) | ILS (K) | Gain (K) | Spectro (K) | Offset (K) | Noise (K) | Random (K) | Syst (K) |
|---------------|----------|----------|---------|---------|----------|-------------|------------|-----------|------------|----------|
| 20            | 215.7    | <0.1     | <0.1    | 0.2     | 0.4      | 0.2         | <0.1       | 0.3       | 0.4        | 0.4      |
| 30            | 222.2    | <0.1     | <0.1    | 0.4     | 0.3      | 0.4         | <0.1       | 0.3       | 0.4        | 0.6      |
| 40            | 242.2    | <0.1     | <0.1    | 0.2     | 0.4      | 0.5         | <0.1       | 0.3       | 0.4        | 0.6      |
| 50            | 254.4    | <0.1     | <0.1    | 0.5     | 0.3      | 0.4         | 0.1        | 0.4       | 0.5        | 0.7      |
| 60            | 238.3    | <0.1     | <0.1    | 0.3     | 0.2      | 1.0         | 0.3        | 0.9       | 0.9        | 1.0      |
| 70            | 215.9    | 0.2      | 0.2     | 0.4     | 0.2      | 0.9         | 0.8        | 2.4       | 2.6        | 1.0      |
| 80            | 194.3    | 0.6      | <0.1    | 0.6     | 0.2      | 0.5         | 0.9        | 4.6       | 4.7        | 0.7      |
| 90            | 191.1    | 1.3      | 1.4     | 0.9     | 0.4      | 0.2         | 1.5        | 5.9       | 6.2        | 1.7      |
| 100           | 195.7    | 7.8      | 1.4     | 0.6     | 1.0      | 0.6         | 1.9        | 7.4       | 8.3        | 7.4      |
| 110           | 252.2    | 23.4     | 5.9     | 2.1     | 0.9      | 0.5         | 4.4        | 18.4      | 20.6       | 22.8     |
| 115           | 310.1    | 28.5     | 8.2     | 3.4     | 1.0      | 0.6         | 6.1        | 26.3      | 28.9       | 28.1     |

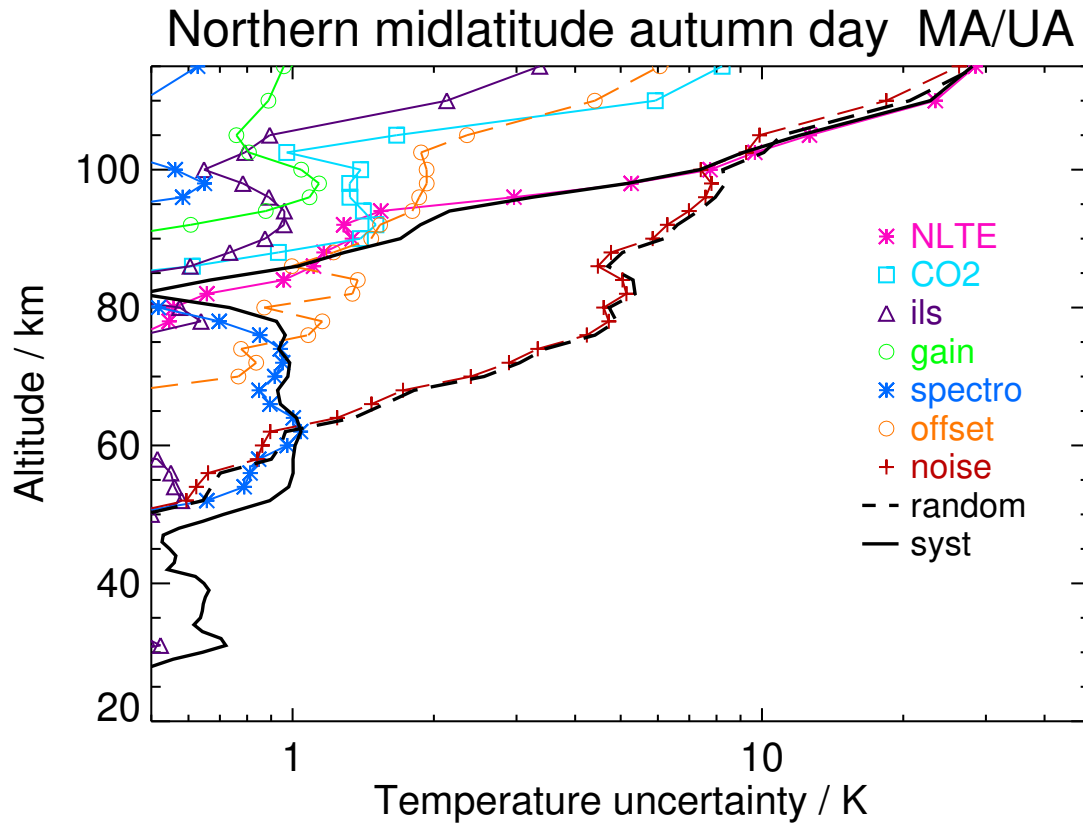**Figure S15.** Temperature uncertainties for Northern midlatitude autumn daytime conditions. Values for selected altitudes are given in Table S16.

**Table S17.** Temperature error budget for Northern midlatitude autumn night. All uncertainties are  $1\sigma$ .

| Altitude (km) | Mean (K) | NLTE (K) | CO2 (K) | ILS (K) | Gain (K) | Spectro (K) | Offset (K) | Noise (K) | Random (K) | Syst (K) |
|---------------|----------|----------|---------|---------|----------|-------------|------------|-----------|------------|----------|
| 20            | 216.5    | <0.1     | <0.1    | 0.2     | 0.4      | 0.2         | <0.1       | 0.3       | 0.4        | 0.4      |
| 30            | 222.8    | <0.1     | <0.1    | 0.4     | 0.4      | 0.3         | <0.1       | 0.3       | 0.3        | 0.6      |
| 40            | 241.3    | <0.1     | <0.1    | 0.2     | 0.4      | 0.5         | <0.1       | 0.3       | 0.4        | 0.7      |
| 50            | 253.4    | <0.1     | <0.1    | 0.5     | 0.3      | 0.4         | 0.1        | 0.4       | 0.5        | 0.7      |
| 60            | 237.3    | <0.1     | <0.1    | 0.3     | 0.2      | 1.0         | 0.3        | 0.9       | 0.9        | 1.0      |
| 70            | 216.3    | 0.3      | 0.2     | 0.5     | 0.2      | 1.0         | 0.8        | 2.4       | 2.6        | 1.1      |
| 80            | 196.7    | 0.8      | <0.1    | 0.6     | 0.2      | 0.7         | 1.0        | 4.8       | 4.9        | 0.9      |
| 90            | 197.0    | 2.5      | 1.4     | 1.1     | 0.4      | 0.2         | 1.4        | 5.8       | 6.1        | 2.6      |
| 100           | 191.2    | 6.7      | 1.0     | 0.6     | 1.0      | 0.5         | 1.8        | 7.5       | 8.1        | 6.5      |
| 110           | 231.5    | 18.8     | 4.8     | 1.6     | 0.7      | 0.4         | 4.7        | 19.1      | 21.5       | 17.5     |
| 115           | 286.9    | 23.1     | 6.8     | 2.5     | 0.8      | 0.5         | 6.3        | 27.0      | 29.7       | 21.7     |

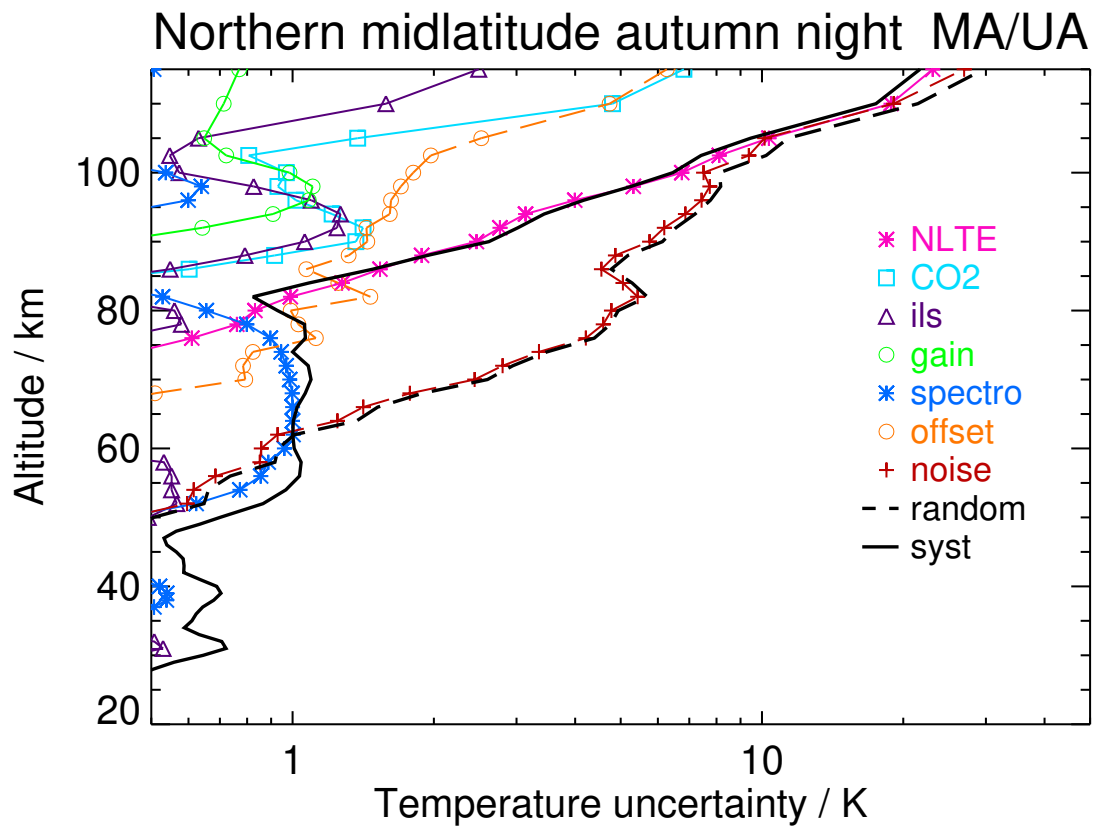

**Figure S16.** Temperature uncertainties for Northern midlatitude autumn nighttime conditions. Values for selected altitudes are given in Table S17.

**Table S18.** Temperature error budget for Tropics day. All uncertainties are  $1\sigma$ .

| Altitude (km) | Mean (K) | NLTE (K) | CO2 (K) | ILS (K) | Gain (K) | Spectro (K) | Offset (K) | Noise (K) | Random (K) | Syst (K) |
|---------------|----------|----------|---------|---------|----------|-------------|------------|-----------|------------|----------|
| 20            | 203.2    | <0.1     | <0.1    | <0.1    | 0.2      | 0.8         | <0.1       | 0.2       | 0.3        | 0.8      |
| 30            | 230.1    | <0.1     | <0.1    | 0.5     | 0.3      | 0.5         | <0.1       | 0.3       | 0.3        | 0.7      |
| 40            | 254.4    | <0.1     | <0.1    | 0.3     | 0.4      | 0.6         | <0.1       | 0.3       | 0.4        | 0.7      |
| 50            | 263.7    | <0.1     | <0.1    | 0.5     | 0.3      | 0.4         | 0.1        | 0.4       | 0.5        | 0.7      |
| 60            | 241.9    | <0.1     | <0.1    | 0.4     | 0.2      | 1.1         | 0.3        | 0.8       | 0.9        | 1.2      |
| 70            | 207.7    | 0.2      | 0.2     | 0.6     | 0.2      | 1.0         | 0.7        | 2.3       | 2.5        | 1.1      |
| 80            | 190.0    | 0.6      | 0.1     | 0.7     | 0.2      | 0.5         | 1.1        | 4.8       | 4.9        | 0.8      |
| 90            | 193.4    | 1.6      | 1.5     | 1.1     | 0.4      | 0.2         | 1.4        | 5.7       | 6.1        | 2.0      |
| 100           | 190.8    | 5.7      | 1.3     | 0.5     | 0.7      | 0.3         | 1.8        | 7.0       | 7.6        | 5.5      |
| 110           | 239.9    | 19.1     | 7.6     | 1.9     | 0.8      | 0.4         | 4.5        | 18.7      | 21.3       | 18.6     |
| 115           | 295.7    | 23.8     | 10.4    | 3.2     | 0.9      | 0.6         | 6.1        | 26.5      | 29.5       | 23.6     |

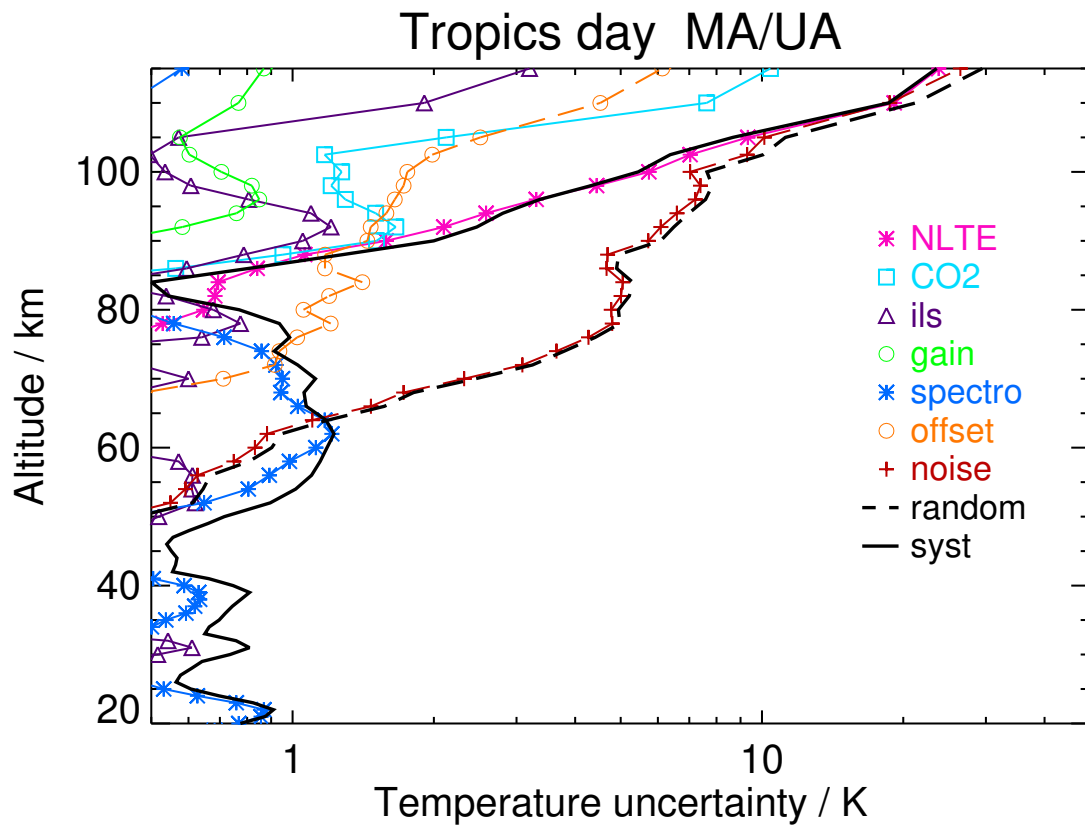

**Figure S17.** Temperature uncertainties for Tropics daytime conditions. Values for selected altitudes are given in Table S18.

**Table S19.** Temperature error budget for Tropics night. All uncertainties are  $1\sigma$ .

| Altitude (km) | Mean (K) | NLTE (K) | CO2 (K) | ILS (K) | Gain (K) | Spectro (K) | Offset (K) | Noise (K) | Random (K) | Syst (K) |
|---------------|----------|----------|---------|---------|----------|-------------|------------|-----------|------------|----------|
| 20            | 203.0    | <0.1     | <0.1    | <0.1    | 0.2      | 0.7         | <0.1       | 0.2       | 0.3        | 0.7      |
| 30            | 230.5    | <0.1     | <0.1    | 0.5     | 0.3      | 0.4         | <0.1       | 0.3       | 0.3        | 0.7      |
| 40            | 253.5    | <0.1     | <0.1    | 0.3     | 0.4      | 0.6         | <0.1       | 0.3       | 0.4        | 0.8      |
| 50            | 264.1    | <0.1     | <0.1    | 0.5     | 0.3      | 0.5         | 0.1        | 0.4       | 0.5        | 0.7      |
| 60            | 243.7    | <0.1     | <0.1    | 0.3     | 0.2      | 1.1         | 0.3        | 0.8       | 0.8        | 1.2      |
| 70            | 203.3    | <0.1     | <0.1    | 0.6     | 0.2      | 1.0         | 0.8        | 2.5       | 2.6        | 1.2      |
| 80            | 190.5    | 0.8      | <0.1    | 1.4     | 0.1      | 0.3         | 1.2        | 5.1       | 5.3        | 1.4      |
| 90            | 191.9    | 1.9      | 1.2     | 1.2     | 0.5      | 0.4         | 1.5        | 5.8       | 6.1        | 2.3      |
| 100           | 184.1    | 5.9      | 1.5     | 0.5     | 0.7      | 0.4         | 1.9        | 7.4       | 7.9        | 5.8      |
| 110           | 261.8    | 23.2     | 9.5     | 2.3     | 0.8      | 0.5         | 4.6        | 18.9      | 21.4       | 23.6     |
| 115           | 308.2    | 28.6     | 13.1    | 3.5     | 1.0      | 0.7         | 6.2        | 26.7      | 29.6       | 29.6     |

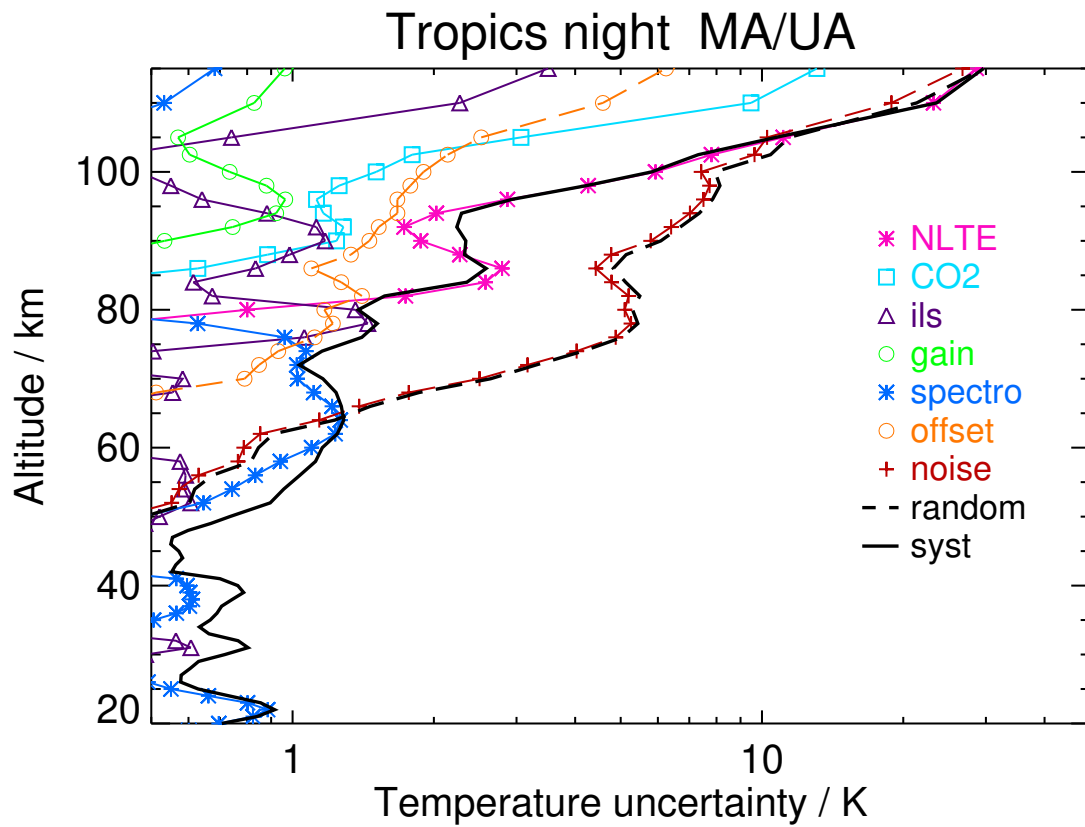

**Figure S18.** Temperature uncertainties for Tropics nighttime conditions. Values for selected altitudes are given in Table S19.

**Table S20.** Temperature error budget for Southern midlatitude winter day. All uncertainties are  $1\sigma$ .

| Altitude (km) | Mean (K) | NLTE (K) | CO2 (K) | ILS (K) | Gain (K) | Spectro (K) | Offset (K) | Noise (K) | Random (K) | Syst (K) |
|---------------|----------|----------|---------|---------|----------|-------------|------------|-----------|------------|----------|
| 20            | 216.7    | <0.1     | <0.1    | 0.1     | 0.4      | 0.2         | <0.1       | 0.3       | 0.3        | 0.4      |
| 30            | 220.2    | <0.1     | <0.1    | 0.4     | 0.4      | 0.6         | <0.1       | 0.3       | 0.5        | 0.6      |
| 40            | 242.3    | <0.1     | <0.1    | 0.3     | 0.4      | 0.6         | <0.1       | 0.3       | 0.6        | 0.7      |
| 50            | 257.2    | <0.1     | <0.1    | 0.5     | 0.3      | 0.6         | 0.1        | 0.5       | 0.7        | 0.8      |
| 60            | 238.2    | <0.1     | <0.1    | 0.4     | 0.3      | 1.0         | 0.2        | 0.9       | 1.0        | 1.0      |
| 70            | 211.9    | 0.2      | 0.2     | 0.4     | 0.2      | 1.0         | 0.7        | 2.5       | 2.6        | 1.0      |
| 80            | 203.4    | 0.9      | <0.1    | 0.5     | 0.2      | 0.5         | 1.4        | 5.0       | 5.2        | 0.9      |
| 90            | 191.5    | 1.3      | 1.3     | 1.1     | 0.5      | 0.2         | 1.3        | 5.6       | 5.9        | 1.9      |
| 100           | 183.5    | 7.1      | 1.9     | 0.7     | 0.9      | 0.5         | 2.3        | 8.4       | 9.2        | 6.8      |
| 110           | 267.3    | 21.5     | 10.6    | 2.1     | 0.7      | 0.5         | 6.5        | 23.7      | 26.3       | 22.1     |
| 115           | 323.7    | 24.8     | 13.0    | 2.8     | 0.7      | 0.6         | 7.9        | 29.1      | 32.1       | 25.9     |

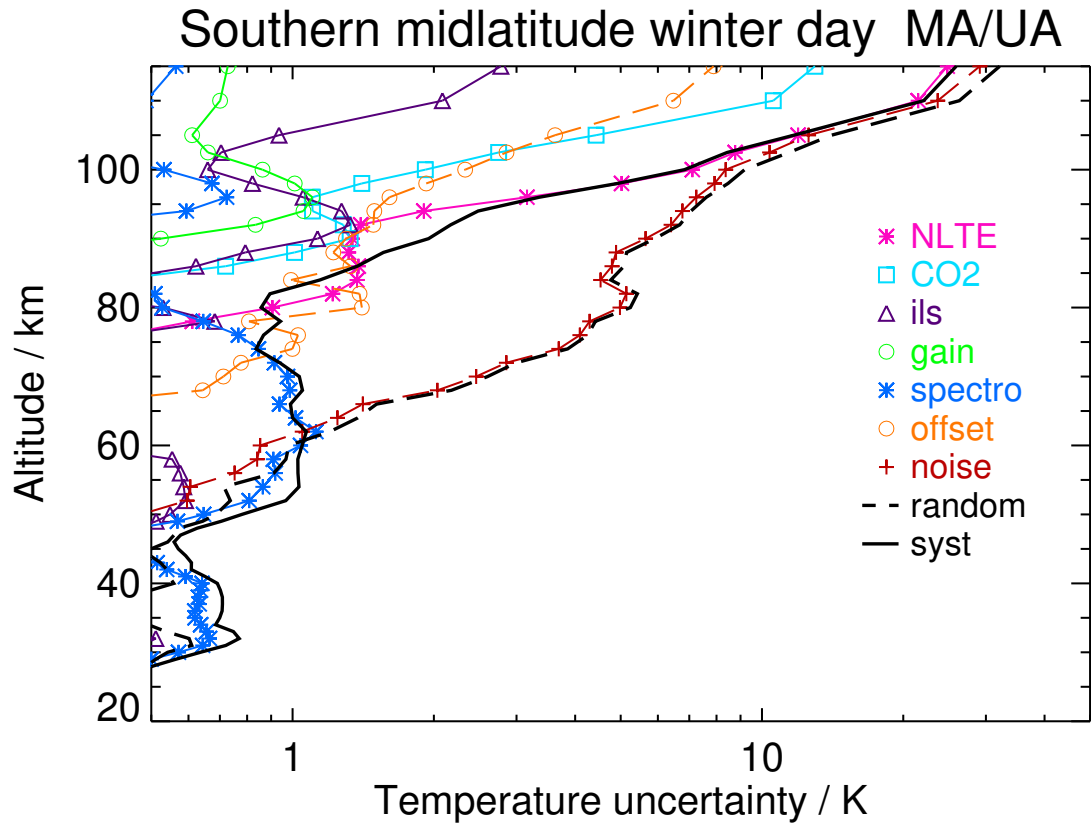**Figure S19.** Temperature uncertainties for Southern midlatitude winter daytime conditions. Values for selected altitudes are given in Table S20.

**Table S21.** Temperature error budget for Southern midlatitude winter night. All uncertainties are  $1\sigma$ .

| Altitude (km) | Mean (K) | NLTE (K) | CO2 (K) | ILS (K) | Gain (K) | Spectro (K) | Offset (K) | Noise (K) | Random (K) | Syst (K) |
|---------------|----------|----------|---------|---------|----------|-------------|------------|-----------|------------|----------|
| 20            | 211.9    | <0.1     | <0.1    | 0.2     | 0.4      | 0.3         | <0.1       | 0.3       | 0.4        | 0.5      |
| 30            | 213.0    | <0.1     | <0.1    | 0.4     | 0.4      | 0.5         | <0.1       | 0.3       | 0.5        | 0.6      |
| 40            | 239.7    | <0.1     | <0.1    | 0.2     | 0.5      | 0.8         | <0.1       | 0.3       | 0.6        | 0.8      |
| 50            | 261.1    | <0.1     | <0.1    | 0.6     | 0.4      | 0.6         | 0.1        | 0.5       | 0.7        | 0.7      |
| 60            | 244.0    | 0.1      | <0.1    | 0.4     | 0.3      | 1.0         | 0.2        | 0.8       | 0.9        | 1.1      |
| 70            | 216.8    | 0.3      | 0.2     | 0.4     | 0.2      | 0.9         | 0.7        | 2.4       | 2.6        | 1.0      |
| 80            | 200.8    | 1.0      | <0.1    | 0.4     | 0.2      | 0.6         | 1.3        | 5.0       | 5.2        | 0.9      |
| 90            | 188.3    | 1.8      | 1.2     | 1.3     | 0.6      | 0.2         | 1.4        | 5.8       | 6.1        | 2.4      |
| 100           | 189.6    | 8.6      | 2.1     | 0.9     | 1.0      | 0.6         | 2.3        | 8.4       | 9.2        | 8.5      |
| 110           | 270.3    | 24.4     | 11.8    | 2.4     | 0.9      | 0.6         | 6.2        | 23.4      | 26.4       | 25.1     |
| 115           | 324.4    | 27.8     | 14.7    | 3.2     | 0.9      | 0.7         | 7.8        | 29.1      | 32.6       | 29.1     |

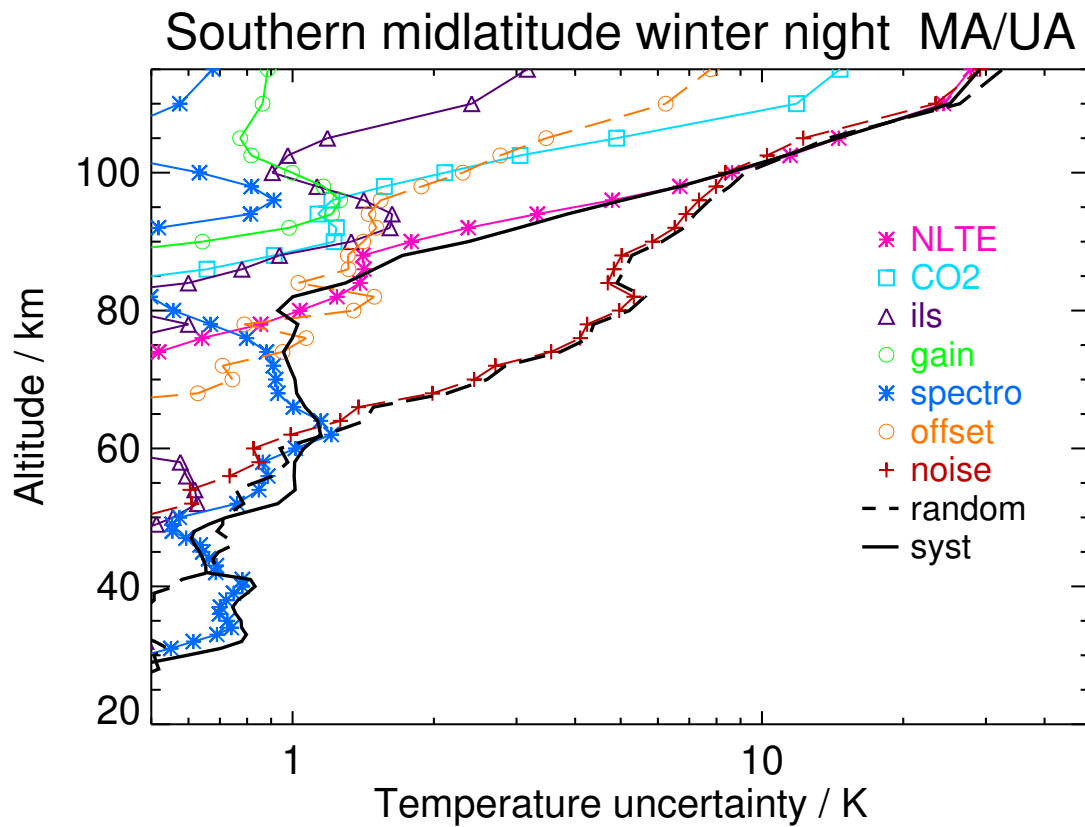

**Figure S20.** Temperature uncertainties for Southern midlatitude winter nighttime conditions. Values for selected altitudes are given in Table S21.

**Table S22.** Temperature error budget for Southern midlatitude spring day. All uncertainties are  $1\sigma$ .

| Altitude (km) | Mean (K) | NLTE (K) | CO2 (K) | ILS (K) | Gain (K) | Spectro (K) | Offset (K) | Noise (K) | Random (K) | Syst (K) |
|---------------|----------|----------|---------|---------|----------|-------------|------------|-----------|------------|----------|
| 20            | 223.1    | <0.1     | <0.1    | 0.1     | 0.4      | 0.2         | <0.1       | 0.2       | 0.4        | 0.4      |
| 30            | 229.7    | <0.1     | <0.1    | 0.4     | 0.4      | 0.3         | <0.1       | 0.3       | 0.4        | 0.6      |
| 40            | 246.1    | <0.1     | <0.1    | 0.3     | 0.4      | 0.5         | <0.1       | 0.3       | 0.4        | 0.7      |
| 50            | 261.4    | <0.1     | <0.1    | 0.5     | 0.3      | 0.4         | 0.1        | 0.4       | 0.5        | 0.7      |
| 60            | 243.3    | <0.1     | <0.1    | 0.3     | 0.2      | 1.1         | 0.2        | 0.8       | 0.8        | 1.1      |
| 70            | 212.7    | 0.1      | 0.2     | 0.5     | 0.2      | 0.9         | 0.7        | 2.3       | 2.4        | 1.0      |
| 80            | 193.9    | 0.6      | 0.1     | 0.4     | 0.2      | 0.6         | 1.4        | 5.0       | 5.2        | 0.7      |
| 90            | 183.9    | 1.3      | 1.4     | 0.9     | 0.4      | 0.2         | 1.4        | 5.7       | 6.0        | 1.7      |
| 100           | 188.4    | 8.5      | 2.2     | 0.6     | 1.0      | 0.6         | 2.2        | 8.4       | 9.3        | 8.3      |
| 110           | 271.4    | 27.0     | 10.0    | 3.3     | 1.1      | 0.7         | 5.7        | 21.5      | 23.7       | 27.8     |
| 115           | 341.9    | 32.7     | 13.4    | 4.7     | 1.2      | 0.9         | 7.5        | 28.3      | 30.8       | 34.3     |

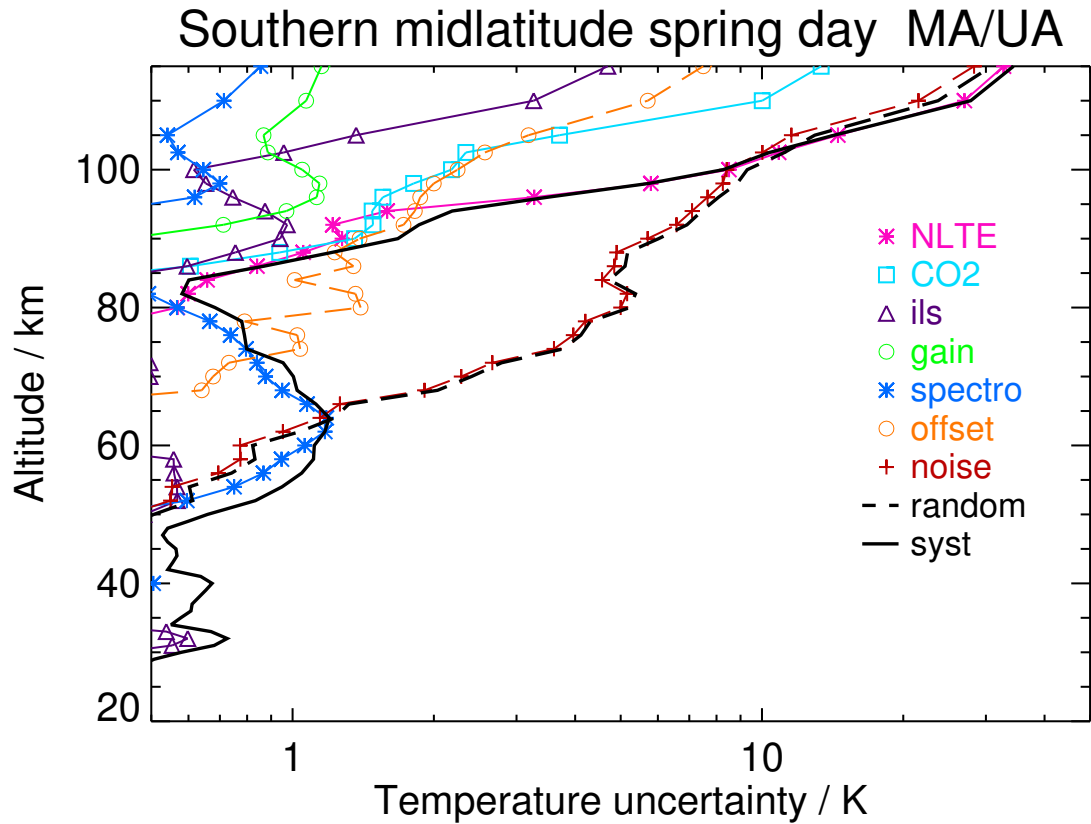**Figure S21.** Temperature uncertainties for Southern midlatitude spring daytime conditions. Values for selected altitudes are given in Table S22.



**Table S23.** Temperature error budget for Southern midlatitude spring night. All uncertainties are  $1\sigma$ .

| Altitude (km) | Mean (K) | NLTE (K) | CO2 (K) | ILS (K) | Gain (K) | Spectro (K) | Offset (K) | Noise (K) | Random (K) | Syst (K) |
|---------------|----------|----------|---------|---------|----------|-------------|------------|-----------|------------|----------|
| 20            | 222.8    | <0.1     | <0.1    | 0.2     | 0.4      | 0.1         | <0.1       | 0.3       | 0.4        | 0.4      |
| 30            | 229.9    | <0.1     | <0.1    | 0.5     | 0.4      | 0.4         | <0.1       | 0.3       | 0.4        | 0.7      |
| 40            | 247.2    | <0.1     | <0.1    | 0.3     | 0.5      | 0.6         | <0.1       | 0.3       | 0.4        | 0.7      |
| 50            | 262.4    | <0.1     | <0.1    | 0.5     | 0.3      | 0.4         | 0.1        | 0.4       | 0.5        | 0.7      |
| 60            | 243.1    | <0.1     | <0.1    | 0.3     | 0.2      | 1.1         | 0.2        | 0.8       | 0.8        | 1.1      |
| 70            | 215.2    | 0.2      | 0.2     | 0.5     | 0.2      | 0.9         | 0.8        | 2.3       | 2.5        | 1.0      |
| 80            | 192.2    | 0.5      | 0.1     | 0.5     | 0.2      | 0.6         | 1.3        | 5.0       | 5.2        | 0.8      |
| 90            | 185.4    | 1.5      | 1.2     | 1.6     | 0.6      | 0.2         | 1.5        | 5.9       | 6.1        | 2.4      |
| 100           | 192.8    | 8.8      | 1.8     | 0.5     | 1.0      | 0.7         | 2.0        | 8.0       | 8.7        | 8.6      |
| 110           | 262.8    | 25.4     | 9.6     | 2.0     | 0.8      | 0.5         | 4.8        | 20.0      | 21.7       | 26.3     |
| 115           | 311.7    | 30.6     | 13.1    | 3.2     | 0.9      | 0.7         | 6.5        | 27.7      | 29.7       | 32.3     |

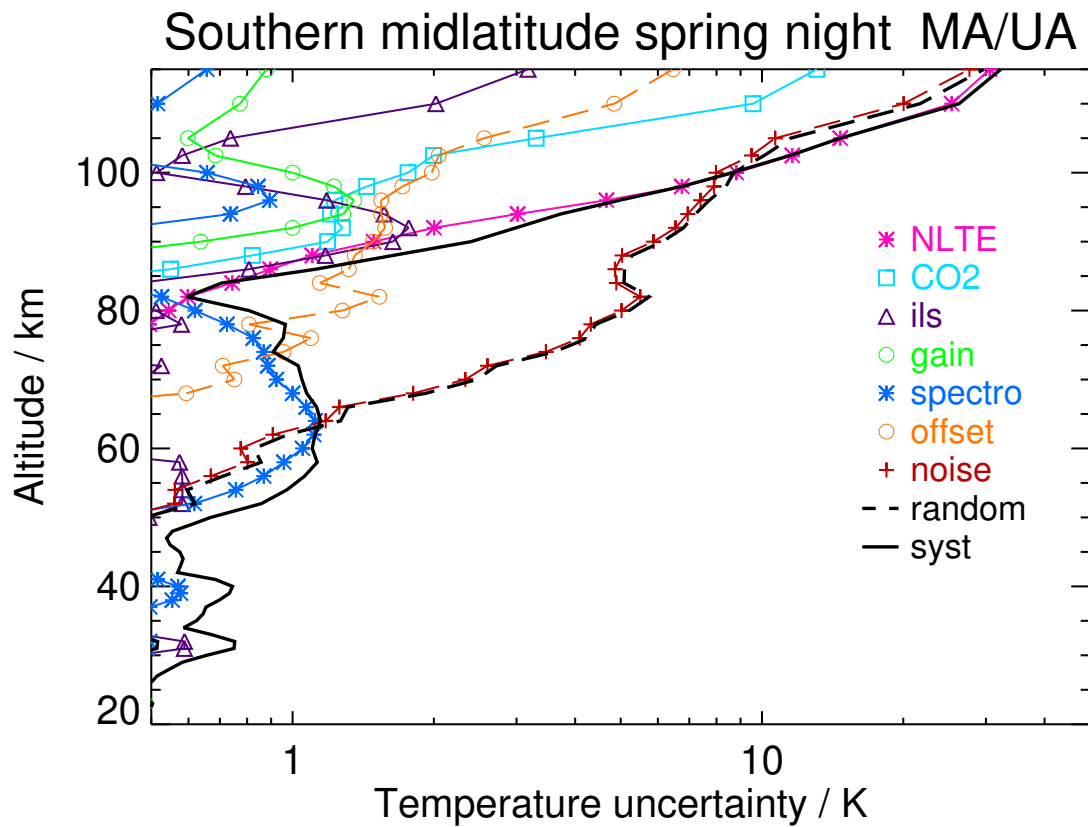

**Figure S22.** Temperature uncertainties for Southern midlatitude spring nighttime conditions. Values for selected altitudes are given in Table S23.

**Table S24.** Temperature error budget for Southern midlatitude summer day. All uncertainties are  $1\sigma$ .

| Altitude (km) | Mean (K) | NLTE (K) | CO2 (K) | ILS (K) | Gain (K) | Spectro (K) | Offset (K) | Noise (K) | Random (K) | Syst (K) |
|---------------|----------|----------|---------|---------|----------|-------------|------------|-----------|------------|----------|
| 20            | 218.1    | <0.1     | <0.1    | 0.2     | 0.3      | 0.2         | <0.1       | 0.3       | 0.4        | 0.4      |
| 30            | 233.3    | <0.1     | <0.1    | 0.6     | 0.3      | 0.4         | <0.1       | 0.3       | 0.3        | 0.7      |
| 40            | 256.4    | <0.1     | <0.1    | 0.2     | 0.4      | 0.4         | <0.1       | 0.3       | 0.4        | 0.7      |
| 50            | 267.4    | <0.1     | <0.1    | 0.5     | 0.3      | 0.4         | 0.1        | 0.4       | 0.5        | 0.6      |
| 60            | 246.3    | <0.1     | <0.1    | 0.3     | 0.2      | 1.1         | 0.2        | 0.8       | 0.8        | 1.2      |
| 70            | 209.9    | 0.2      | 0.1     | 0.6     | 0.1      | 0.9         | 0.8        | 2.2       | 2.4        | 1.1      |
| 80            | 175.3    | 0.9      | 0.2     | 0.5     | 0.2      | 0.5         | 1.3        | 5.1       | 5.3        | 0.9      |
| 90            | 181.1    | 1.1      | 1.4     | 1.1     | 0.5      | 0.2         | 1.6        | 5.8       | 6.1        | 1.8      |
| 100           | 200.0    | 11.3     | 3.5     | 0.5     | 0.8      | 0.4         | 2.0        | 8.0       | 9.1        | 11.3     |
| 110           | 305.7    | 37.3     | 20.3    | 4.2     | 1.3      | 0.8         | 5.7        | 21.7      | 25.3       | 41.0     |
| 115           | 356.3    | 43.2     | 25.4    | 5.8     | 1.4      | 0.9         | 7.8        | 28.5      | 32.4       | 48.7     |

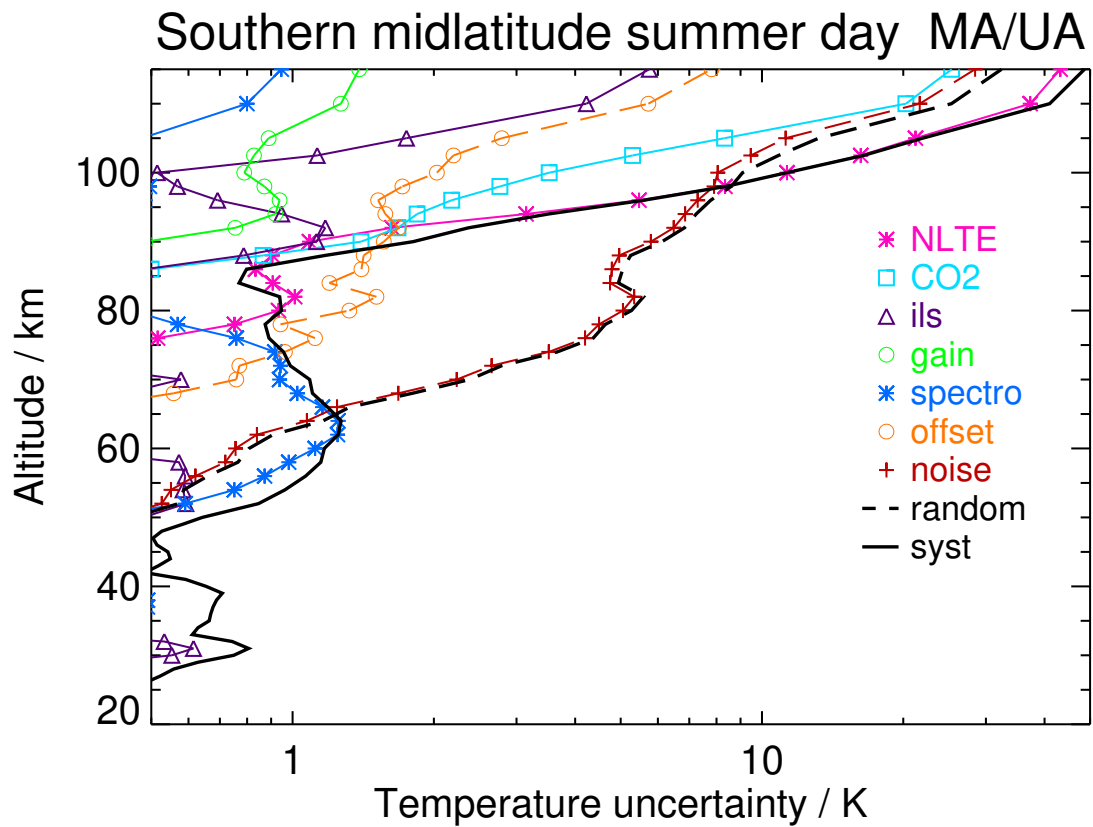

**Figure S23.** Temperature uncertainties for Southern midlatitude summer daytime conditions. Values for selected altitudes are given in Table S24.

**Table S25.** Temperature error budget for Southern midlatitude summer night. All uncertainties are  $1\sigma$ .

| Altitude (km) | Mean (K) | NLTE (K) | CO2 (K) | ILS (K) | Gain (K) | Spectro (K) | Offset (K) | Noise (K) | Random (K) | Syst (K) |
|---------------|----------|----------|---------|---------|----------|-------------|------------|-----------|------------|----------|
| 20            | 219.8    | <0.1     | <0.1    | 0.2     | 0.3      | 0.2         | <0.1       | 0.3       | 0.4        | 0.4      |
| 30            | 234.2    | <0.1     | <0.1    | 0.5     | 0.3      | 0.4         | <0.1       | 0.3       | 0.3        | 0.8      |
| 40            | 259.8    | <0.1     | <0.1    | 0.3     | 0.5      | 0.5         | <0.1       | 0.3       | 0.3        | 0.8      |
| 50            | 268.7    | <0.1     | <0.1    | 0.5     | 0.3      | 0.5         | 0.1        | 0.4       | 0.5        | 0.7      |
| 60            | 247.5    | <0.1     | <0.1    | 0.4     | 0.2      | 1.1         | 0.2        | 0.7       | 0.8        | 1.2      |
| 70            | 210.7    | <0.1     | 0.2     | 0.6     | 0.2      | 1.0         | 0.8        | 2.3       | 2.4        | 1.2      |
| 80            | 182.0    | 0.5      | 0.2     | 0.7     | 0.2      | 0.7         | 1.4        | 5.3       | 5.5        | 0.9      |
| 90            | 182.7    | 1.7      | 1.1     | 2.0     | 0.7      | 0.2         | 1.4        | 5.8       | 6.1        | 2.7      |
| 100           | 194.4    | 9.4      | 2.8     | 0.5     | 0.6      | 0.5         | 2.0        | 8.1       | 9.2        | 9.1      |
| 110           | 262.0    | 26.0     | 12.0    | 2.2     | 0.8      | 0.5         | 5.6        | 21.4      | 23.7       | 27.4     |
| 115           | 322.7    | 31.3     | 15.9    | 3.4     | 0.9      | 0.7         | 7.3        | 28.4      | 31.1       | 33.8     |

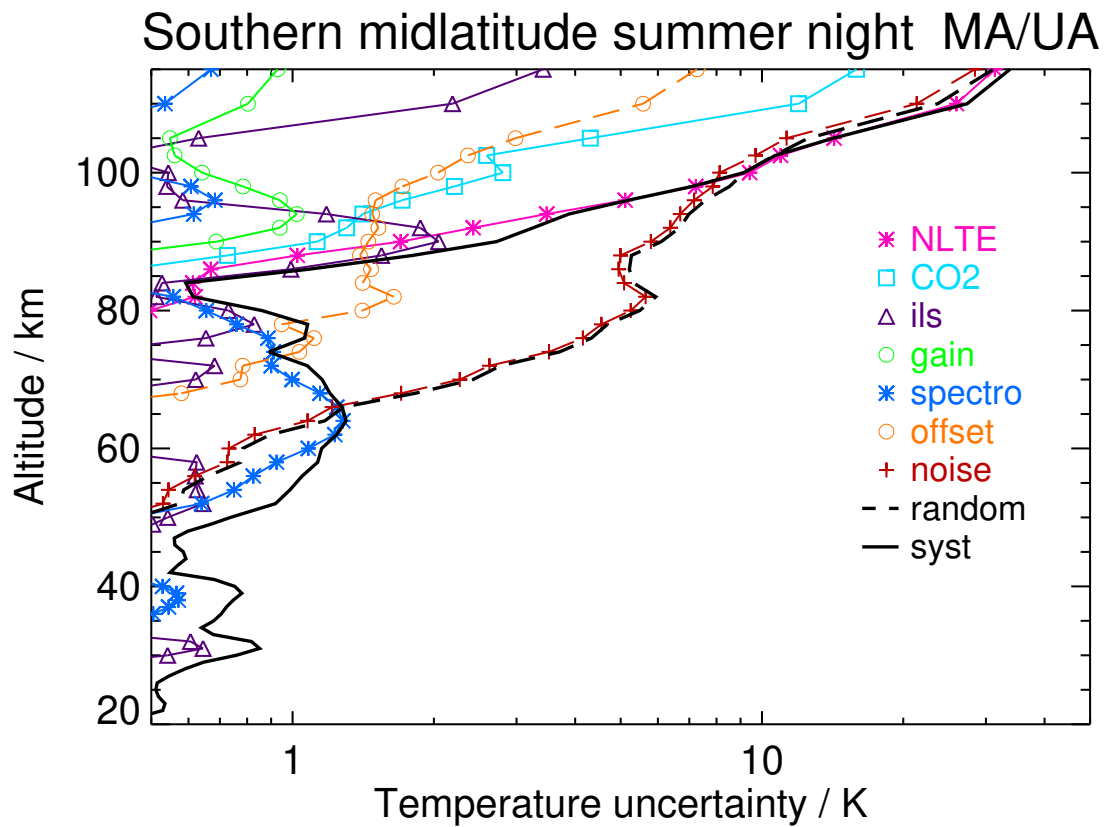

**Figure S24.** Temperature uncertainties for Southern midlatitude summer nighttime conditions. Values for selected altitudes are given in Table S25.

**Table S26.** Temperature error budget for Southern midlatitude autumn day. All uncertainties are  $1\sigma$ .

| Altitude (km) | Mean (K) | NLTE (K) | CO2 (K) | ILS (K) | Gain (K) | Spectro (K) | Offset (K) | Noise (K) | Random (K) | Syst (K) |
|---------------|----------|----------|---------|---------|----------|-------------|------------|-----------|------------|----------|
| 20            | 214.4    | <0.1     | <0.1    | 0.2     | 0.4      | 0.2         | <0.1       | 0.3       | 0.3        | 0.4      |
| 30            | 223.8    | <0.1     | <0.1    | 0.4     | 0.4      | 0.3         | <0.1       | 0.3       | 0.3        | 0.6      |
| 40            | 242.4    | <0.1     | <0.1    | 0.3     | 0.4      | 0.4         | <0.1       | 0.3       | 0.4        | 0.6      |
| 50            | 251.3    | <0.1     | <0.1    | 0.5     | 0.3      | 0.5         | 0.1        | 0.5       | 0.6        | 0.7      |
| 60            | 232.3    | <0.1     | <0.1    | 0.4     | 0.3      | 0.9         | 0.2        | 0.9       | 1.0        | 1.0      |
| 70            | 221.5    | 0.3      | 0.3     | 0.4     | 0.2      | 0.9         | 0.7        | 2.2       | 2.4        | 1.0      |
| 80            | 193.2    | 0.7      | <0.1    | 0.5     | 0.2      | 0.7         | 1.4        | 5.1       | 5.3        | 0.9      |
| 90            | 187.8    | 1.1      | 1.3     | 1.0     | 0.4      | 0.2         | 1.3        | 5.7       | 6.0        | 1.7      |
| 100           | 194.9    | 8.4      | 1.5     | 0.6     | 0.9      | 0.6         | 1.9        | 8.1       | 8.8        | 8.1      |
| 110           | 258.6    | 25.6     | 7.6     | 2.1     | 0.9      | 0.5         | 5.3        | 20.8      | 23.2       | 25.3     |
| 115           | 315.8    | 30.9     | 10.4    | 3.0     | 0.9      | 0.6         | 7.0        | 28.0      | 30.8       | 30.9     |

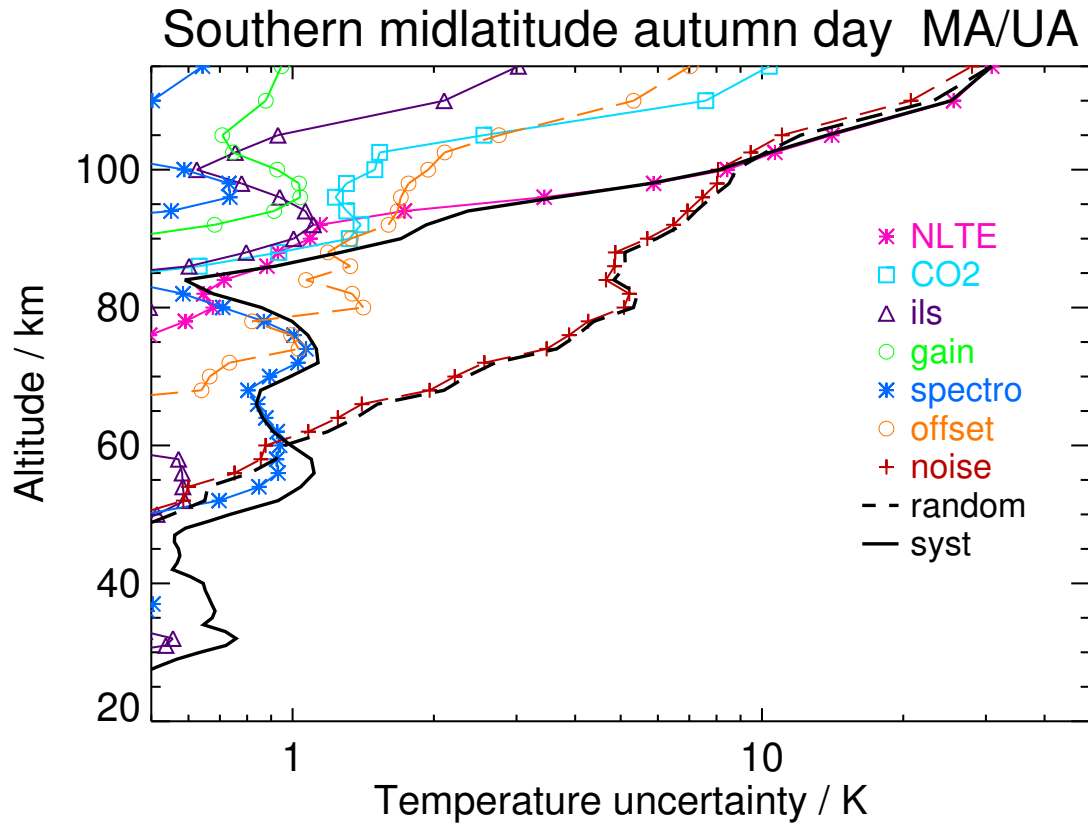

**Figure S25.** Temperature uncertainties for Southern midlatitude autumn daytime conditions. Values for selected altitudes are given in Table S26.

**Table S27.** Temperature error budget for Southern midlatitude autumn night. All uncertainties are  $1\sigma$ .

| Altitude (km) | Mean (K) | NLTE (K) | CO2 (K) | ILS (K) | Gain (K) | Spectro (K) | Offset (K) | Noise (K) | Random (K) | Syst (K) |
|---------------|----------|----------|---------|---------|----------|-------------|------------|-----------|------------|----------|
| 20            | 215.2    | <0.1     | <0.1    | 0.1     | 0.3      | 0.2         | <0.1       | 0.3       | 0.4        | 0.4      |
| 30            | 222.8    | <0.1     | <0.1    | 0.4     | 0.4      | 0.3         | <0.1       | 0.3       | 0.3        | 0.6      |
| 40            | 243.3    | <0.1     | <0.1    | 0.3     | 0.4      | 0.5         | <0.1       | 0.3       | 0.4        | 0.7      |
| 50            | 253.4    | <0.1     | <0.1    | 0.5     | 0.3      | 0.5         | 0.1        | 0.5       | 0.5        | 0.8      |
| 60            | 232.7    | <0.1     | <0.1    | 0.4     | 0.3      | 0.9         | 0.2        | 0.9       | 0.9        | 1.0      |
| 70            | 220.1    | 0.4      | 0.3     | 0.4     | 0.2      | 0.9         | 0.7        | 2.3       | 2.4        | 1.0      |
| 80            | 195.1    | 0.7      | 0.1     | 0.3     | 0.3      | 0.7         | 1.4        | 5.1       | 5.4        | 0.8      |
| 90            | 188.5    | 1.5      | 1.3     | 1.1     | 0.5      | 0.1         | 1.4        | 5.9       | 6.1        | 2.1      |
| 100           | 200.1    | 8.7      | 1.1     | 0.9     | 1.0      | 0.7         | 1.7        | 7.8       | 8.4        | 8.5      |
| 110           | 249.8    | 23.0     | 6.9     | 1.5     | 0.8      | 0.5         | 4.9        | 19.7      | 21.7       | 22.9     |
| 115           | 301.3    | 28.5     | 10.0    | 2.4     | 0.9      | 0.6         | 6.5        | 27.5      | 30.0       | 28.6     |

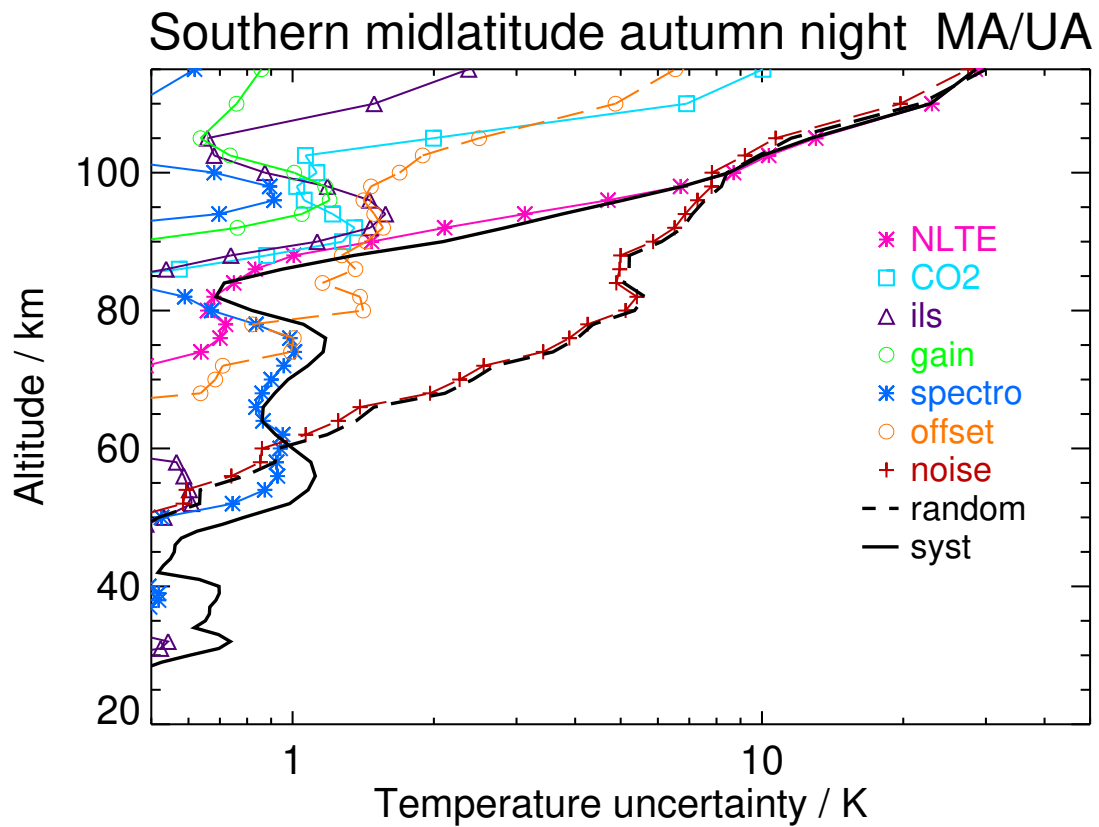

**Figure S26.** Temperature uncertainties for Southern midlatitude autumn nighttime conditions. Values for selected altitudes are given in Table S27.

**Table S28.** Temperature error budget for Southern polar winter day. All uncertainties are  $1\sigma$ .

| Altitude (km) | Mean (K) | NLTE (K) | CO2 (K) | ILS (K) | Gain (K) | Spectro (K) | Offset (K) | Noise (K) | Random (K) | Syst (K) |
|---------------|----------|----------|---------|---------|----------|-------------|------------|-----------|------------|----------|
| 20            | 193.4    | <0.1     | <0.1    | 0.3     | 0.2      | 0.2         | <0.1       | 0.3       | 0.4        | 0.4      |
| 30            | 214.6    | <0.1     | <0.1    | 0.3     | 0.3      | 1.1         | <0.1       | 0.3       | 0.5        | 1.1      |
| 40            | 258.4    | <0.1     | <0.1    | 0.3     | 0.5      | 0.8         | <0.1       | 0.3       | 0.6        | 0.8      |
| 50            | 274.0    | <0.1     | <0.1    | 0.6     | 0.4      | 0.6         | 0.1        | 0.5       | 0.7        | 0.7      |
| 60            | 252.4    | 0.2      | <0.1    | 0.4     | 0.3      | 1.1         | 0.2        | 0.9       | 1.0        | 1.1      |
| 70            | 216.5    | 0.2      | 0.2     | 0.4     | 0.2      | 0.9         | 0.6        | 2.3       | 2.4        | 1.0      |
| 80            | 202.9    | 0.8      | <0.1    | 0.6     | 0.2      | 0.5         | 1.5        | 5.0       | 5.3        | 0.8      |
| 90            | 192.3    | 1.4      | 1.4     | 1.4     | 0.6      | 0.1         | 1.4        | 5.9       | 6.1        | 2.3      |
| 100           | 191.1    | 7.4      | 1.7     | 0.8     | 0.8      | 0.4         | 2.2        | 8.5       | 9.1        | 7.2      |
| 110           | 267.8    | 21.6     | 10.1    | 2.2     | 0.8      | 0.5         | 6.6        | 23.7      | 25.8       | 22.6     |
| 115           | 331.0    | 24.9     | 12.5    | 2.9     | 0.9      | 0.6         | 8.1        | 29.0      | 31.5       | 26.4     |

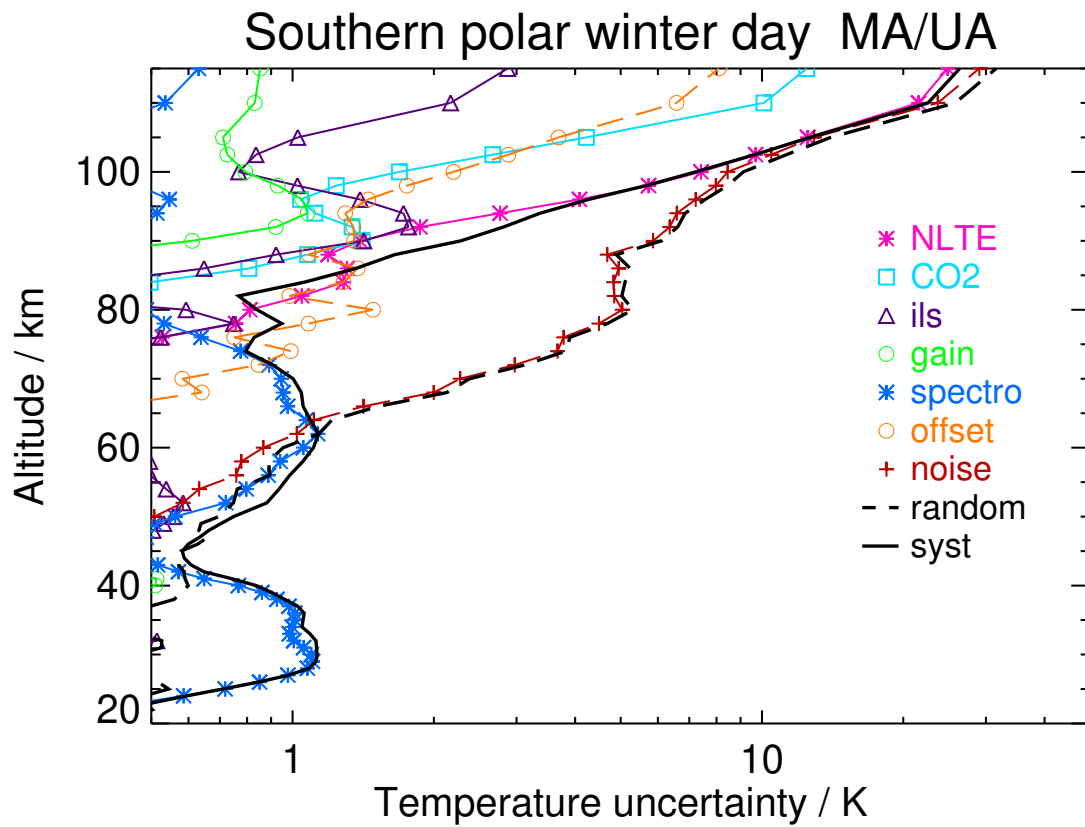

**Figure S27.** Temperature uncertainties for Southern polar winter daytime conditions. Values for selected altitudes are given in Table S28.

**Table S29.** Temperature error budget for Southern polar winter night. All uncertainties are  $1\sigma$ .

| Altitude (km) | Mean (K) | NLTE (K) | CO2 (K) | ILS (K) | Gain (K) | Spectro (K) | Offset (K) | Noise (K) | Random (K) | Syst (K) |
|---------------|----------|----------|---------|---------|----------|-------------|------------|-----------|------------|----------|
| 20            | 194.7    | <0.1     | <0.1    | 0.3     | 0.2      | 0.3         | <0.1       | 0.3       | 0.4        | 0.4      |
| 30            | 214.7    | <0.1     | <0.1    | 0.3     | 0.3      | 1.0         | <0.1       | 0.3       | 0.4        | 1.1      |
| 40            | 259.8    | <0.1     | <0.1    | 0.3     | 0.5      | 0.8         | <0.1       | 0.3       | 0.6        | 0.9      |
| 50            | 269.3    | <0.1     | <0.1    | 0.6     | 0.4      | 0.4         | 0.1        | 0.5       | 0.6        | 0.7      |
| 60            | 255.8    | 0.2      | <0.1    | 0.4     | 0.3      | 1.0         | 0.2        | 0.8       | 0.9        | 1.1      |
| 70            | 223.6    | 0.5      | 0.2     | 0.4     | 0.3      | 1.0         | 0.6        | 2.2       | 2.3        | 1.1      |
| 80            | 201.5    | 0.9      | <0.1    | 0.4     | 0.3      | 0.5         | 1.5        | 5.1       | 5.4        | 0.8      |
| 90            | 193.2    | 2.1      | 1.4     | 1.3     | 0.6      | 0.1         | 1.4        | 5.9       | 6.3        | 2.4      |
| 100           | 185.4    | 7.7      | 2.1     | 1.1     | 1.0      | 0.5         | 2.4        | 8.6       | 9.3        | 7.6      |
| 110           | 268.2    | 20.1     | 9.7     | 2.0     | 0.8      | 0.5         | 6.6        | 23.9      | 26.0       | 21.1     |
| 115           | 337.4    | 23.0     | 11.8    | 2.6     | 0.8      | 0.6         | 8.0        | 28.9      | 31.2       | 24.5     |

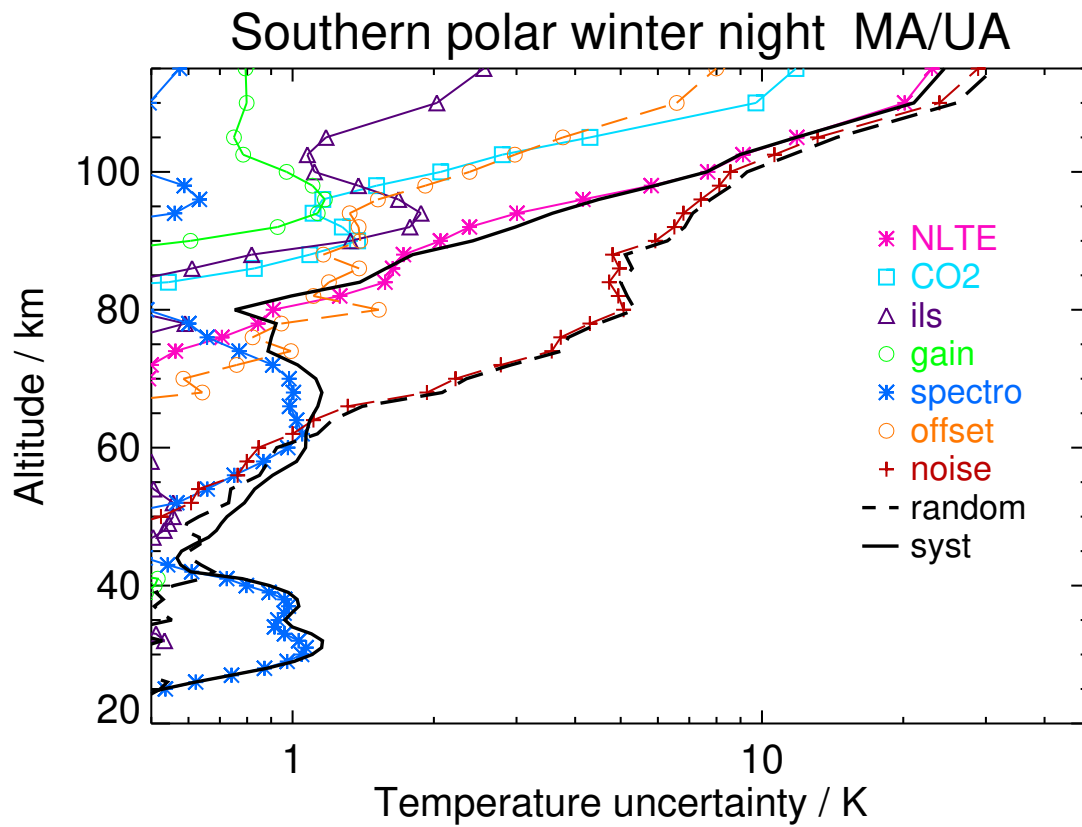

**Figure S28.** Temperature uncertainties for Southern polar winter nighttime conditions. Values for selected altitudes are given in Table S29.

**Table S30.** Temperature error budget for Southern polar spring day. All uncertainties are  $1\sigma$ .

| Altitude (km) | Mean (K) | NLTE (K) | CO2 (K) | ILS (K) | Gain (K) | Spectro (K) | Offset (K) | Noise (K) | Random (K) | Syst (K) |
|---------------|----------|----------|---------|---------|----------|-------------|------------|-----------|------------|----------|
| 20            | 212.0    | <0.1     | <0.1    | 0.2     | 0.2      | 1.1         | <0.1       | 0.3       | 0.6        | 1.0      |
| 30            | 253.8    | <0.1     | <0.1    | 0.4     | 0.4      | 0.7         | <0.1       | 0.3       | 0.6        | 0.7      |
| 40            | 266.5    | <0.1     | <0.1    | 0.3     | 0.5      | 0.2         | <0.1       | 0.3       | 0.4        | 0.6      |
| 50            | 272.2    | <0.1     | <0.1    | 0.5     | 0.3      | 0.4         | 0.1        | 0.4       | 0.5        | 0.7      |
| 60            | 251.7    | <0.1     | <0.1    | 0.3     | 0.2      | 1.1         | 0.2        | 0.8       | 0.8        | 1.1      |
| 70            | 215.3    | <0.1     | 0.1     | 0.5     | 0.2      | 1.0         | 0.5        | 2.0       | 2.1        | 1.1      |
| 80            | 183.6    | 0.7      | 0.2     | 0.4     | 0.2      | 0.5         | 1.5        | 5.2       | 5.5        | 0.8      |
| 90            | 179.7    | 1.0      | 1.3     | 1.1     | 0.5      | 0.1         | 1.6        | 6.0       | 6.3        | 1.7      |
| 100           | 186.1    | 9.0      | 2.8     | 0.5     | 0.9      | 0.6         | 2.3        | 8.7       | 9.4        | 9.1      |
| 110           | 289.0    | 32.9     | 14.7    | 4.4     | 1.3      | 0.8         | 6.1        | 22.2      | 24.9       | 35.1     |
| 115           | 355.2    | 38.6     | 18.5    | 6.0     | 1.4      | 1.0         | 8.0        | 28.8      | 31.6       | 42.0     |

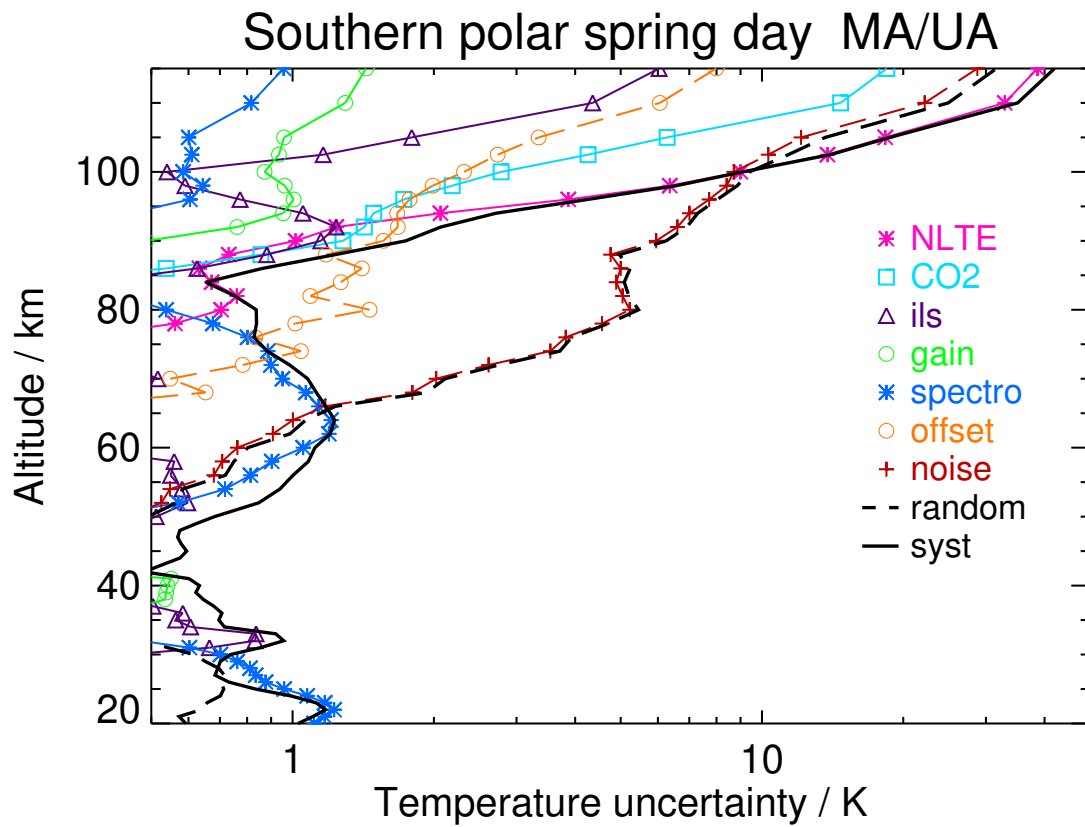**Figure S29.** Temperature uncertainties for Southern polar spring daytime conditions. Values for selected altitudes are given in Table S30.



**Table S31.** Temperature error budget for Southern polar spring night. All uncertainties are  $1\sigma$ .

| Altitude (km) | Mean (K) | NLTE (K) | CO2 (K) | ILS (K) | Gain (K) | Spectro (K) | Offset (K) | Noise (K) | Random (K) | Syst (K) |
|---------------|----------|----------|---------|---------|----------|-------------|------------|-----------|------------|----------|
| 20            | 215.9    | <0.1     | <0.1    | <0.1    | 0.3      | 0.7         | <0.1       | 0.3       | 0.5        | 0.6      |
| 30            | 248.1    | <0.1     | <0.1    | 0.6     | 0.4      | 0.6         | <0.1       | 0.3       | 0.5        | 0.8      |
| 40            | 263.6    | <0.1     | <0.1    | 0.4     | 0.5      | 0.3         | <0.1       | 0.3       | 0.4        | 0.7      |
| 50            | 267.9    | <0.1     | <0.1    | 0.6     | 0.3      | 0.5         | 0.1        | 0.4       | 0.5        | 0.7      |
| 60            | 244.2    | <0.1     | <0.1    | 0.4     | 0.2      | 1.1         | 0.2        | 0.8       | 0.8        | 1.2      |
| 70            | 212.0    | 0.1      | 0.2     | 0.6     | 0.2      | 0.9         | 0.6        | 2.3       | 2.4        | 1.1      |
| 80            | 194.2    | 0.5      | 0.1     | 0.4     | 0.2      | 0.5         | 1.5        | 5.2       | 5.4        | 0.7      |
| 90            | 186.1    | 1.5      | 1.2     | 1.3     | 0.6      | 0.1         | 1.5        | 5.9       | 6.2        | 2.2      |
| 100           | 186.3    | 8.1      | 2.0     | 0.5     | 0.9      | 0.7         | 2.2        | 8.3       | 9.0        | 8.0      |
| 110           | 268.6    | 26.1     | 11.4    | 2.6     | 0.8      | 0.6         | 5.6        | 21.5      | 24.3       | 26.9     |
| 115           | 331.6    | 31.7     | 15.1    | 3.8     | 0.9      | 0.7         | 7.4        | 28.4      | 31.7       | 33.3     |

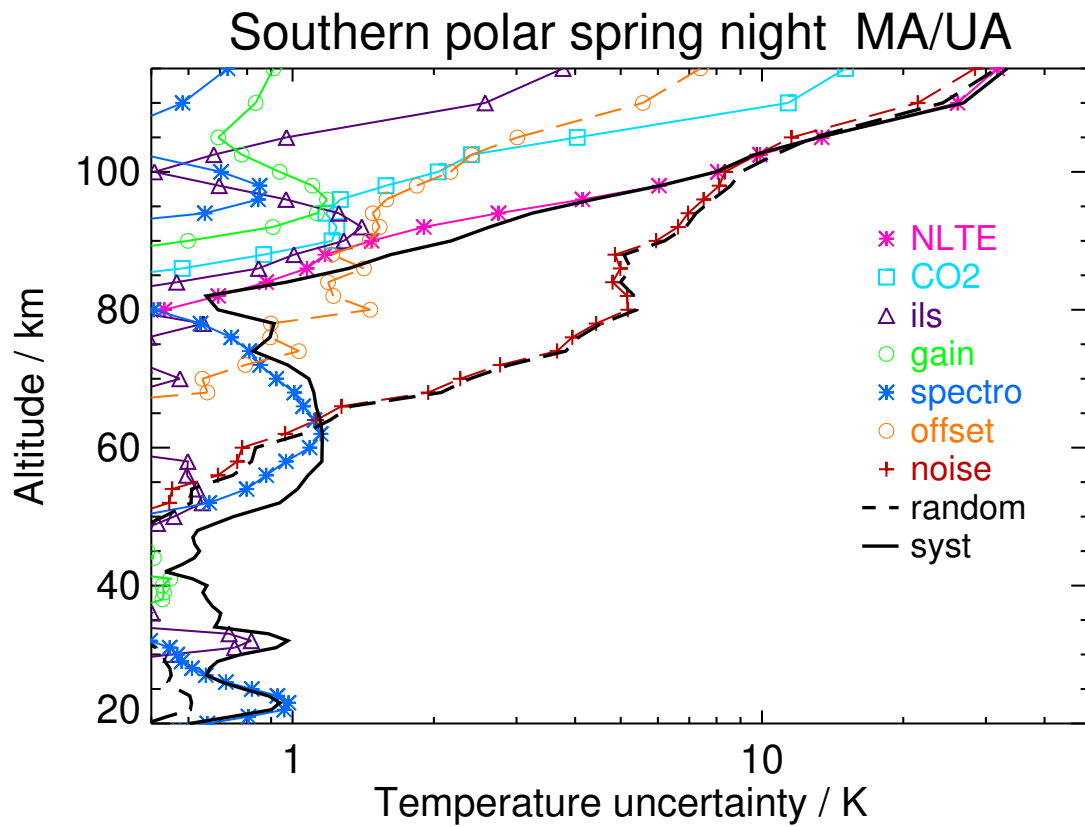

**Figure S30.** Temperature uncertainties for Southern polar spring nighttime conditions. Values for selected altitudes are given in Table S31.

**Table S32.** Temperature error budget for Southern polar summer day. All uncertainties are  $1\sigma$ .

| Altitude (km) | Mean (K) | NLTE (K) | CO2 (K) | ILS (K) | Gain (K) | Spectro (K) | Offset (K) | Noise (K) | Random (K) | Syst (K) |
|---------------|----------|----------|---------|---------|----------|-------------|------------|-----------|------------|----------|
| 20            | 233.2    | <0.1     | <0.1    | <0.1    | 0.4      | 0.1         | <0.1       | 0.3       | 0.3        | 0.4      |
| 30            | 241.2    | <0.1     | <0.1    | 0.6     | 0.3      | 0.3         | <0.1       | 0.3       | 0.3        | 0.7      |
| 40            | 264.9    | <0.1     | <0.1    | 0.3     | 0.5      | 0.4         | <0.1       | 0.2       | 0.3        | 0.7      |
| 50            | 282.6    | <0.1     | <0.1    | 0.5     | 0.2      | 0.2         | 0.1        | 0.4       | 0.5        | 0.6      |
| 60            | 265.6    | <0.1     | <0.1    | 0.4     | 0.2      | 1.0         | 0.2        | 0.7       | 0.7        | 1.1      |
| 70            | 225.2    | <0.1     | 0.2     | 0.3     | 0.2      | 1.2         | 0.5        | 1.7       | 1.8        | 1.3      |
| 80            | 167.2    | 1.1      | 0.5     | 0.9     | 0.3      | 0.6         | 1.5        | 5.4       | 5.6        | 1.5      |
| 90            | 143.3    | 1.1      | 1.2     | 0.7     | 0.4      | 0.2         | 2.1        | 5.9       | 6.4        | 1.5      |
| 100           | 216.2    | 15.8     | 8.0     | 1.2     | 1.0      | 0.6         | 2.2        | 8.5       | 9.9        | 17.2     |
| 110           | 326.3    | 41.7     | 31.5    | 5.9     | 1.6      | 1.0         | 6.2        | 22.2      | 25.8       | 51.3     |
| 115           | 369.6    | 46.9     | 37.5    | 7.8     | 1.8      | 1.1         | 8.4        | 28.7      | 32.4       | 59.3     |

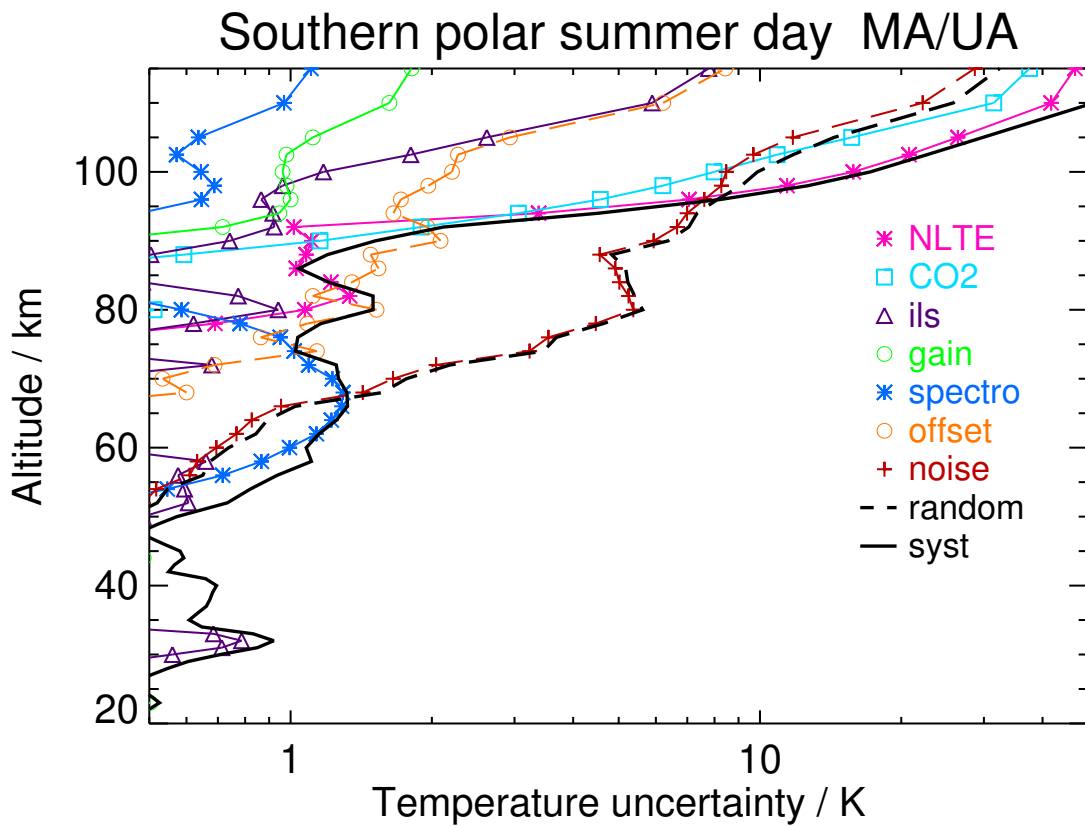

**Figure S31.** Temperature uncertainties for Southern polar summer daytime conditions. Values for selected altitudes are given in Table S32.

**Table S33.** Temperature error budget for Southern polar summer night. All uncertainties are  $1\sigma$ .

| Altitude (km) | Mean (K) | NLTE (K) | CO2 (K) | ILS (K) | Gain (K) | Spectro (K) | Offset (K) | Noise (K) | Random (K) | Syst (K) |
|---------------|----------|----------|---------|---------|----------|-------------|------------|-----------|------------|----------|
| 20            | 226.7    | <0.1     | <0.1    | 0.1     | 0.4      | <0.1        | <0.1       | 0.3       | 0.3        | 0.4      |
| 30            | 233.2    | <0.1     | <0.1    | 0.5     | 0.4      | 0.3         | <0.1       | 0.3       | 0.3        | 0.7      |
| 40            | 254.8    | <0.1     | <0.1    | 0.3     | 0.5      | 0.5         | <0.1       | 0.3       | 0.3        | 0.7      |
| 50            | 268.0    | <0.1     | <0.1    | 0.5     | 0.3      | 0.4         | 0.1        | 0.4       | 0.5        | 0.7      |
| 60            | 249.3    | <0.1     | <0.1    | 0.3     | 0.2      | 1.1         | 0.2        | 0.7       | 0.8        | 1.1      |
| 70            | 214.5    | 0.1      | 0.1     | 0.6     | 0.2      | 1.1         | 0.6        | 2.0       | 2.1        | 1.2      |
| 80            | 174.8    | 0.6      | 0.2     | 0.5     | 0.2      | 0.6         | 1.5        | 5.5       | 5.8        | 0.8      |
| 90            | 177.9    | 1.2      | 1.1     | 1.8     | 0.7      | 0.3         | 1.6        | 6.1       | 6.3        | 2.4      |
| 100           | 204.2    | 12.1     | 2.9     | 0.5     | 0.8      | 0.5         | 2.0        | 8.3       | 9.0        | 12.1     |
| 110           | 286.0    | 33.5     | 15.1    | 3.0     | 1.0      | 0.7         | 5.7        | 21.3      | 25.4       | 34.7     |
| 115           | 340.5    | 39.1     | 19.2    | 4.3     | 1.1      | 0.8         | 7.7        | 28.4      | 32.7       | 41.4     |

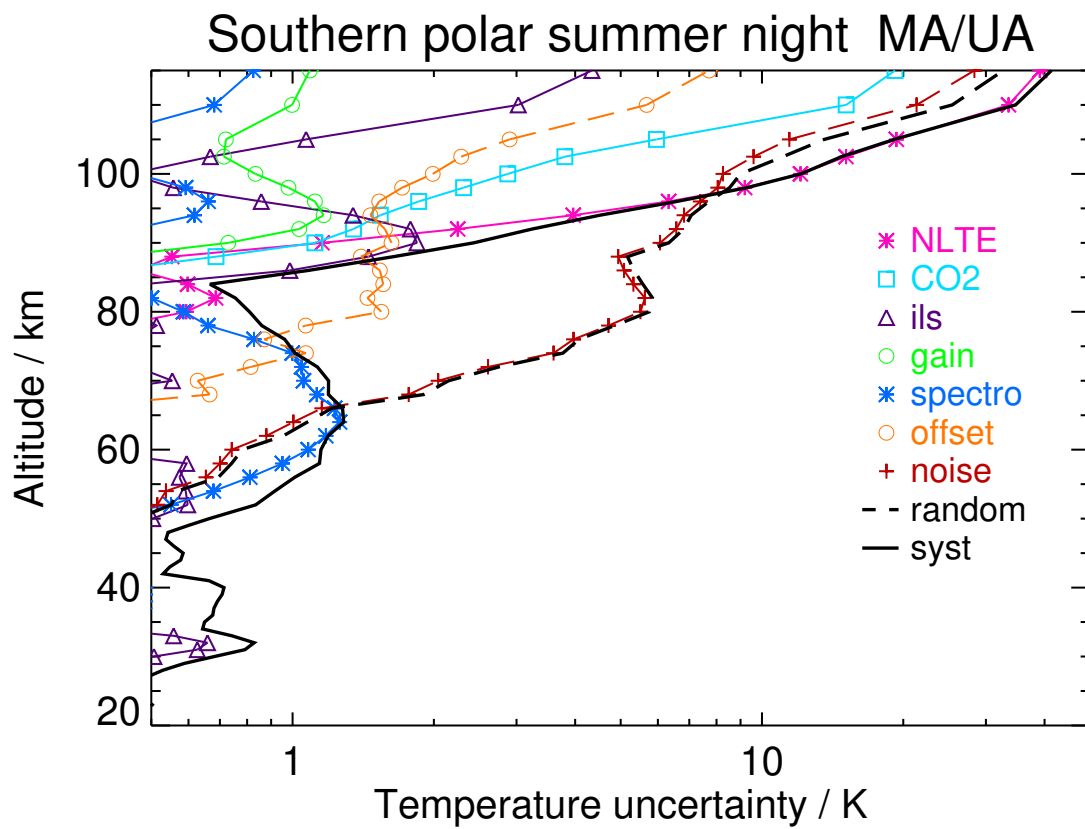

**Figure S32.** Temperature uncertainties for Southern polar summer nighttime conditions. Values for selected altitudes are given in Table S33.

**Table S34.** Temperature error budget for Southern polar autumn day. All uncertainties are  $1\sigma$ .

| Altitude (km) | Mean (K) | NLTE (K) | CO2 (K) | ILS (K) | Gain (K) | Spectro (K) | Offset (K) | Noise (K) | Random (K) | Syst (K) |
|---------------|----------|----------|---------|---------|----------|-------------|------------|-----------|------------|----------|
| 20            | 214.0    | <0.1     | <0.1    | 0.2     | 0.4      | 0.3         | <0.1       | 0.3       | 0.3        | 0.5      |
| 30            | 212.6    | <0.1     | <0.1    | 0.4     | 0.4      | 0.3         | <0.1       | 0.3       | 0.4        | 0.6      |
| 40            | 230.3    | <0.1     | <0.1    | 0.2     | 0.4      | 0.5         | <0.1       | 0.3       | 0.4        | 0.7      |
| 50            | 252.5    | <0.1     | <0.1    | 0.4     | 0.4      | 0.3         | 0.1        | 0.5       | 0.6        | 0.6      |
| 60            | 244.0    | 0.1      | <0.1    | 0.3     | 0.2      | 1.1         | 0.2        | 0.9       | 1.0        | 1.1      |
| 70            | 220.5    | 0.3      | 0.2     | 0.4     | 0.2      | 0.9         | 0.6        | 2.2       | 2.3        | 1.0      |
| 80            | 208.3    | 0.9      | <0.1    | 0.5     | 0.2      | 0.7         | 1.4        | 4.9       | 5.2        | 1.1      |
| 90            | 192.9    | 1.1      | 1.4     | 1.0     | 0.5      | 0.2         | 1.4        | 5.8       | 6.0        | 1.8      |
| 100           | 192.3    | 6.3      | 1.3     | 0.8     | 0.9      | 0.4         | 1.8        | 8.1       | 8.6        | 6.2      |
| 110           | 259.5    | 23.3     | 8.1     | 1.8     | 0.8      | 0.5         | 5.4        | 21.0      | 23.5       | 23.1     |
| 115           | 317.0    | 28.3     | 11.0    | 2.6     | 0.8      | 0.6         | 7.3        | 28.2      | 31.0       | 28.5     |

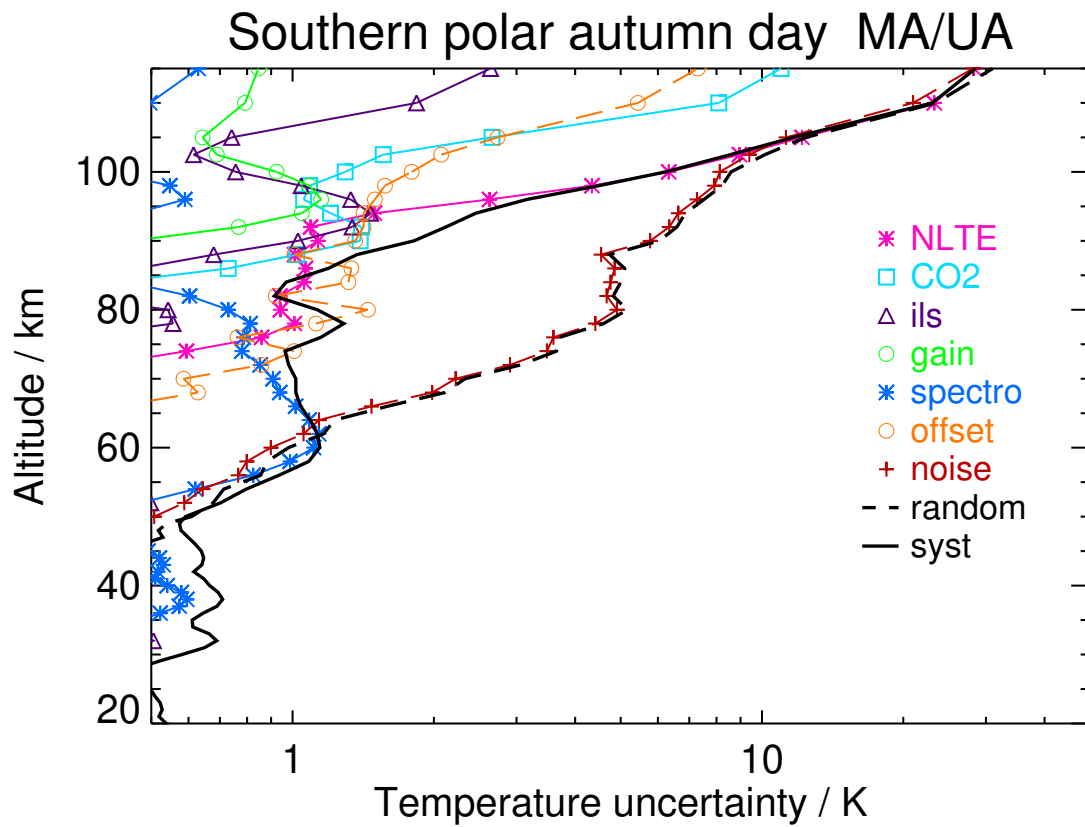

**Figure S33.** Temperature uncertainties for Southern polar autumn daytime conditions. Values for selected altitudes are given in Table S34.

**Table S35.** Temperature error budget for Southern polar autumn night. All uncertainties are  $1\sigma$ .

| Altitude (km) | Mean (K) | NLTE (K) | CO2 (K) | ILS (K) | Gain (K) | Spectro (K) | Offset (K) | Noise (K) | Random (K) | Syst (K) |
|---------------|----------|----------|---------|---------|----------|-------------|------------|-----------|------------|----------|
| 20            | 211.2    | <0.1     | <0.1    | 0.2     | 0.4      | 0.4         | <0.1       | 0.3       | 0.3        | 0.6      |
| 30            | 211.0    | <0.1     | <0.1    | 0.4     | 0.4      | 0.2         | <0.1       | 0.3       | 0.4        | 0.6      |
| 40            | 229.9    | <0.1     | <0.1    | 0.2     | 0.4      | 0.5         | <0.1       | 0.3       | 0.4        | 0.7      |
| 50            | 253.4    | <0.1     | <0.1    | 0.5     | 0.4      | 0.3         | 0.1        | 0.5       | 0.6        | 0.6      |
| 60            | 248.3    | 0.2      | <0.1    | 0.3     | 0.2      | 1.0         | 0.2        | 0.9       | 0.9        | 1.1      |
| 70            | 224.8    | 0.5      | 0.2     | 0.4     | 0.2      | 1.0         | 0.5        | 2.1       | 2.2        | 1.2      |
| 80            | 210.0    | 1.1      | <0.1    | 0.4     | 0.3      | 0.6         | 1.5        | 4.9       | 5.2        | 1.1      |
| 90            | 195.9    | 1.5      | 1.4     | 0.9     | 0.4      | 0.3         | 1.4        | 5.8       | 6.1        | 2.1      |
| 100           | 191.6    | 6.4      | 1.1     | 1.2     | 1.1      | 0.6         | 1.8        | 8.0       | 8.5        | 6.3      |
| 110           | 258.4    | 21.3     | 8.5     | 1.6     | 0.7      | 0.5         | 5.3        | 21.1      | 22.7       | 22.0     |
| 115           | 316.6    | 26.2     | 11.6    | 2.3     | 0.7      | 0.6         | 7.1        | 28.2      | 30.3       | 27.5     |

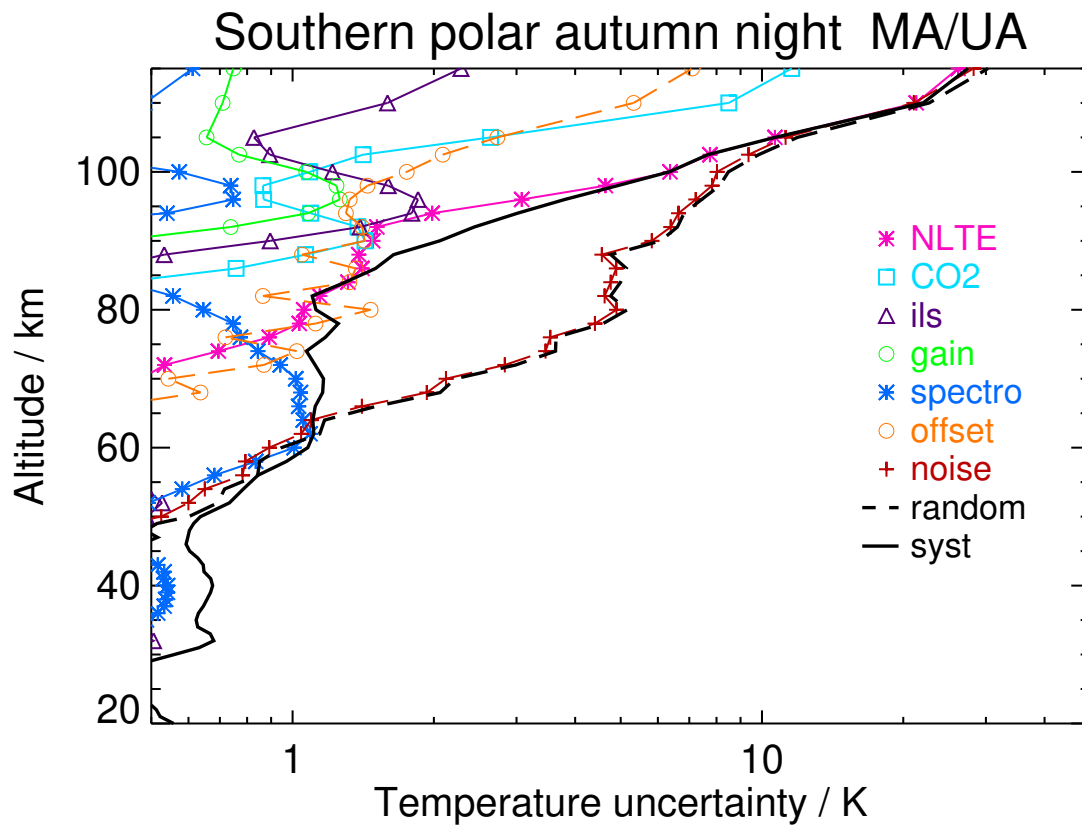

**Figure S34.** Temperature uncertainties for Southern polar autumn nighttime conditions. Values for selected altitudes are given in Table S35.
